# Supplementary material for: Comparative analysis of mutational robustness of the intrinsically disordered viral protein VPg and of its interactor eIF4E
Source: PubMed Central journal article supplement (PMC6375565; doi:10.1371/journal.pone.0211725), 2019-02-14
Supplement: pone.0211725.s001.pdf [file pone.0211725.s001.pdf]

## Comparative analysis of mutational robustness of intrinsically disordered viral protein VPg and of its interactor eIF4E

Jocelyne Walter, Justine Charon, Yihua Hu, Joy Lachat, Thomas Leger, Guillaume Lafforgue, Amandine Barra, Thierry Michon

### SUPPORTING INFORMATION

**S1 Fig.** Mean substitution rates matrixes

**S2 Fig.** Distribution of VPg and eIF4E codon volatility

**S1 Table.** Library characteristics (PEDEL-AA analysis)

**S2 Table.** Matting efficiency in yeast

**S3 Table.** Error prone PCR conditions

**R script for codon volatility calculation**

**S4 Table.** Mutations within the six (low, med, high) samples sequenced to characterize the VPg and eIF4 mutant libraries.

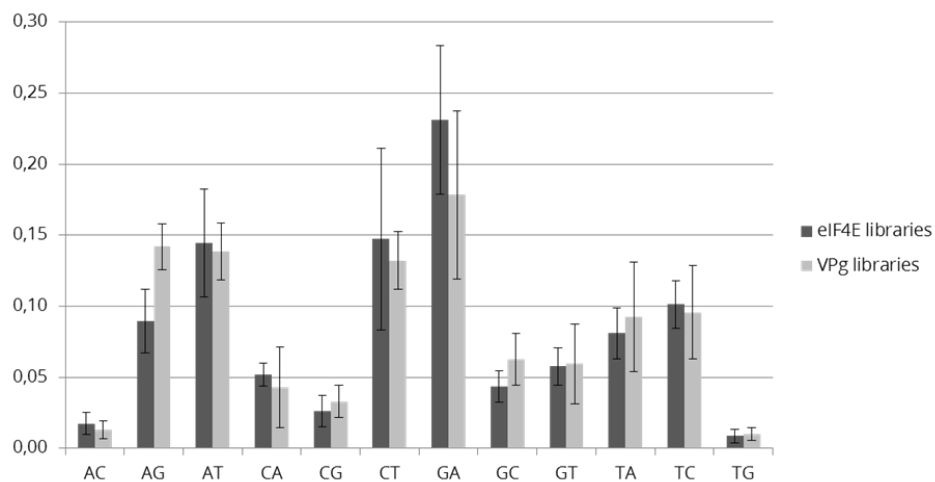

**S1 Fig.** Mean substitution rates obtained for eIF4E and VPg libraries. Vertical bars represent standard errors.
