# Supplementary material for: Comparative analysis of mutational robustness of the intrinsically disordered viral protein VPg and of its interactor eIF4E
Source: PubMed Central journal article supplement (PMC6375565; doi:10.1371/journal.pone.0211725), 2019-02-14
Supplement: pone.0211725.s002.pdf [file pone.0211725.s002.pdf]

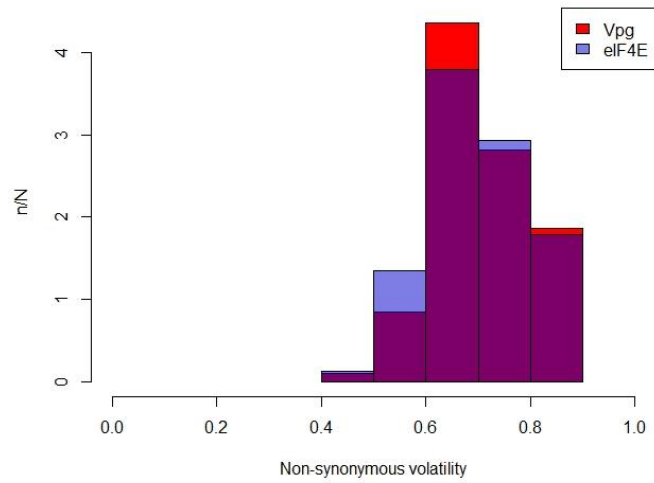

**S2 Fig.** Distribution of VPg and eIF4E codon volatility.  $n/N$  is defined as codon volatility density, with  $n$  : number of codon within a range of volatility values and  $N$  : total number of codons for a given protein sequence.
