# Supplementary material for: Comparative analysis of mutational robustness of the intrinsically disordered viral protein VPg and of its interactor eIF4E
Source: PubMed Central journal article supplement (PMC6375565; doi:10.1371/journal.pone.0211725), 2019-02-14
Supplement: pone.0211725.s003.pdf [file pone.0211725.s003.pdf]

**S1 Table. Library characteristics (PEDEL-AA analysis).** The size of each library was determined. For each of the 6 libraries, 32 variants were randomly chosen and sequenced. From these data, a nucleotide substitution matrix (figure S2) was derived together with the mean number of nucleotide substitutions, insertions and deletions (INDEL). These elements were used to feed the PEDEL-AA algorithm, which returned the specifications expected for each of the 6 libraries.

---

Total library size :  $3 \cdot 10^4$

|                                                            | eIF4E<br>low       | VPg<br>low         | eIF4E<br>med       | VPg<br>med         | eIF4E<br>high      | VPg<br>high        |
|------------------------------------------------------------|--------------------|--------------------|--------------------|--------------------|--------------------|--------------------|
| Number of distinct full-length proteins in the library     | 9543               | 4682               | 13790              | 14160              | 14200              | 14500              |
| Unmutated (wild-type) sequences (% of library)             | 23.30              | 33.40              | 16.10              | 7.47               | 0.62               | 0.21               |
| mean number of AA substitutions per variant (PEDEL-AA)     | 1.23               | 0.76               | 1.66               | 2.20               | 4.43               | 5.46               |
| mean number of AA substitutions per variant (experimental) | 1.16               | 0.47               | 1.94               | 2.05               | 4.56               | 5.37               |
| number of variants with no INDEL or stop codons            | $23.9 \times 10^3$ | $21.4 \times 10^3$ | $25.4 \times 10^3$ | $20.5 \times 10^3$ | $14.6 \times 10^3$ | $14.6 \times 10^3$ |
