# Supplementary material for: Comparative analysis of mutational robustness of the intrinsically disordered viral protein VPg and of its interactor eIF4E
Source: PubMed Central journal article supplement (PMC6375565; doi:10.1371/journal.pone.0211725), 2019-02-14
Supplement: pone.0211725.s004.pdf [file pone.0211725.s004.pdf]

**S2 Table. Matting efficiency in yeast.** Mating efficiency (percentage of diploids) was calculated as : number of cfu/ml of diploids/ number of cfu/ml of limiting partner x 100 =% of diploids. Matting efficiencies (two independent series ) were all in between 15% and 33%. Haploid yeast cells carrying eIF4E and VPg libraries (average of 10<sup>8</sup> cells/mL) were mated with haploid yeast cells bearing the wt VPg or eIF4E gene. According to matting efficiency, at least 15x10<sup>6</sup> diploid cells containing both genes were obtained for interaction screening. This insured that the diversity of the 3x10<sup>4</sup>clones transferred from *E. coli* to yeast was preserved.

**Serie 1**

| Name       | VPg WT    | VPg Low | VPg Medium | VPg High |
|------------|-----------|---------|------------|----------|
| eIF4E WT   | 15% ; 24% | 21%     | 26%        | 16%      |
| eIF4E low  | 26%       |         |            |          |
| eIF4E Med  | 27%       |         |            |          |
| eIF4E High | 30%       |         |            |          |

**Serie 2**

| Name       | VPg WT | VPg Low | VPg Medium | VPg High |
|------------|--------|---------|------------|----------|
| eIF4E WT   | 20%    | 19%     | 18%        | 17%      |
| eIF4E low  | 33%    |         |            |          |
| eIF4E Med  | 25%    |         |            |          |
| eIF4E High | 30%    |         |            |          |
