# Supplementary material for: Comparative analysis of mutational robustness of the intrinsically disordered viral protein VPg and of its interactor eIF4E
Source: PubMed Central journal article supplement (PMC6375565; doi:10.1371/journal.pone.0211725), 2019-02-14
Supplement: pone.0211725.s005.pdf [file pone.0211725.s005.pdf]

**S3 Table. Error prone PCR conditions used to produce “low”, “medium” and “high” libraries.** Amount of DNA target used to generate eIF4E and VPg mutant libraries, using ep-PCR random mutagenesis. 30 cycles amplifications were performed . pDONR201-eIF4E YW and pDONR201-VPg SON41g were used as DNA templates to obtain eIF4E and VPg mutant libraries, respectively . For generating VPg-high and eIF4E-high, the highly mutated libraries, two successive epPCR were performed, (int) stands for conditions of the first epPCR round.

| <b>Library name</b>                  | <b>Amount of target gene</b>             | <b>Total Amount of plasmid</b> |
|--------------------------------------|------------------------------------------|--------------------------------|
| eIF4E-Low                            | 720ng                                    | 2200ng                         |
| VPg-Low                              | 600ng                                    | 2000ng                         |
| eIF4E-Medium                         | 45ng                                     | 137ng                          |
| VPg-Medium                           | 64ng                                     | 200ng                          |
| eIF4E-High<br><i>eIF4E-(int)High</i> | 15ng from eIF4E-(int)High<br><i>14ng</i> | -<br><i>42ng</i>               |
| VPg-High<br><i>VPg-(int)High</i>     | 6ng from VPg(int)High<br><i>6ng</i>      | -<br><i>20ng</i>               |
