# Supplementary material for: Comparative analysis of mutational robustness of the intrinsically disordered viral protein VPg and of its interactor eIF4E
Source: PubMed Central journal article supplement (PMC6375565; doi:10.1371/journal.pone.0211725), 2019-02-14
Supplement: pone.0211725.s006.pdf [file pone.0211725.s006.pdf]

**S4 Table.** Mutations within the six (low, med, high) samples sequenced to characterize the VPg and eIF4 mutant libraries.

| Library sample  | eIF4E LOW |             |          |            |              |          |          |          |                 |            |
|-----------------|-----------|-------------|----------|------------|--------------|----------|----------|----------|-----------------|------------|
| total mutations | 60        |             | 4        | 32         | 26           | 37       | 14       | 5        |                 | 0          |
| mutant ref.     | Mutations | nt Position | INDEL    | Transition | Transversion | NS       | S        | STOP     | aa Substitution | aaPosition |
| <b>430</b>      | <b>1</b>  |             | <b>0</b> | <b>0</b>   | <b>1</b>     | <b>0</b> | <b>1</b> | <b>0</b> | <b>1</b>        | <b>0</b>   |
|                 | AT        | 162         |          | 0          | 1            |          | 1        |          | PP              | 54         |
| <b>431</b>      | <b>5</b>  |             | <b>0</b> | <b>2</b>   | <b>3</b>     | <b>4</b> | <b>0</b> | <b>1</b> | <b>5</b>        | <b>0</b>   |
|                 | GT        | 60          |          | 0          | 1            | 1        |          |          | LF              | 20         |
|                 | GA        | 230         |          | 1          | 0            | 1        |          |          | SN              | 77         |
|                 | AT        | 341         |          | 0          | 1            | 1        |          |          | KM              | 114        |
|                 | GT        | 575         |          | 0          | 1            | 1        |          |          | SI              | 192        |
|                 | GA        | 590         |          | 1          | 0            |          |          | 1        | <b>STOP</b>     | 197        |
| <b>432</b>      | <b>4</b>  |             | <b>0</b> | <b>1</b>   | <b>3</b>     | <b>2</b> | <b>1</b> | <b>1</b> | <b>4</b>        | <b>0</b>   |
|                 | CA        | 113         |          | 0          | 1            | 1        |          |          | TN              | 38         |
|                 | TA        | 329         |          | 0          | 1            |          |          | 1        | <b>STOP</b>     | 110        |
|                 | AG        | 440         |          | 1          | 0            | 1        |          |          | YC              | 147        |
|                 | AC        | 555         |          | 0          | 1            |          | 1        |          | AA              | 185        |
| <b>433</b>      | <b>1</b>  |             | <b>1</b> | <b>0</b>   | <b>0</b>     | <b>0</b> | <b>0</b> | <b>0</b> | <b>1</b>        | <b>0</b>   |
|                 | INSERTION | 536         | 1        | 0          | 0            |          |          |          |                 | 179        |
| <b>434</b>      | <b>2</b>  |             | <b>0</b> | <b>0</b>   | <b>2</b>     | <b>1</b> | <b>1</b> | <b>0</b> | <b>2</b>        | <b>0</b>   |
|                 | TA        | 180         |          | 0          | 1            |          | 1        |          | TT              | 60         |
|                 | GC        | 379         |          | 0          | 1            | 1        |          |          | AP              | 127,0      |
| <b>435</b>      | <b>1</b>  |             | <b>0</b> | <b>1</b>   | <b>0</b>     | <b>0</b> | <b>1</b> | <b>0</b> | <b>1</b>        | <b>0,0</b> |
|                 | GA        | 129         |          | 1          | 0            |          | 1        |          | SS              | 43         |
| <b>436</b>      | <b>4</b>  |             | <b>0</b> | <b>2</b>   | <b>2</b>     | <b>3</b> | <b>0</b> | <b>1</b> | <b>4</b>        | <b>0,0</b> |
|                 | TA        | 120         |          | 0          | 1            | 1        |          |          | DE              | 40         |
|                 | TA        | 134         |          | 0          | 1            |          |          | 1        | <b>STOP</b>     | 45         |

|            |           |     |          |          |          |          |          |          |          |            |
|------------|-----------|-----|----------|----------|----------|----------|----------|----------|----------|------------|
|            | TC        | 175 |          | 1        | 0        | 1        |          |          | WR       | 59,0       |
|            | GA        | 553 |          | 1        | 0        | 1        |          |          | AT       | 185,0      |
| <b>437</b> | <b>7</b>  |     | <b>0</b> | <b>5</b> | <b>2</b> | <b>5</b> | <b>2</b> | <b>0</b> | <b>7</b> | <b>0,0</b> |
|            | AG        | 47  |          | 1        | 0        | 1        |          |          | EG       | 16         |
|            | AT        | 366 |          | 0        | 1        | 1        |          |          | ED       | 122        |
|            | AT        | 398 |          | 0        | 1        | 1        |          |          | KI       | 133        |
|            | CT        | 429 |          | 1        | 0        |          | 1        |          | TT       | 143        |
|            | AG        | 487 |          | 1        | 0        | 1        |          |          | IV       | 163,0      |
|            | GA        | 496 |          | 1        | 0        | 1        |          |          | AT       | 166,0      |
|            | TC        | 600 |          | 1        | 0        |          | 1        |          | FF       | 200        |
| <b>439</b> | <b>2</b>  |     | <b>1</b> | <b>1</b> | <b>0</b> | <b>1</b> | <b>0</b> | <b>0</b> | <b>2</b> | <b>0,0</b> |
|            | INSERTION | 100 | 1        | 0        | 0        |          |          |          |          | 33         |
|            | CT        | 428 |          | 1        | 0        | 1        |          |          | TI       | 143        |
| <b>406</b> | <b>1</b>  |     | <b>0</b> | <b>1</b> | <b>0</b> | <b>1</b> | <b>0</b> | <b>0</b> | <b>1</b> | <b>0,0</b> |
|            | TC        | 536 |          | 1        | 0        | 1        |          |          | LS       | 179        |
| <b>407</b> | <b>4</b>  |     | <b>1</b> | <b>2</b> | <b>1</b> | <b>3</b> | <b>0</b> | <b>0</b> | <b>4</b> | <b>0,0</b> |
|            | GA        | 95  |          | 1        | 0        | 1        |          |          | GD       | 32         |
|            | GA        | 217 |          | 1        | 0        | 1        |          |          | AT       | 73,0       |
|            | INSERTION | 461 | 1        | 0        | 0        |          |          |          |          | 154        |
|            | GT        | 591 |          | 0        | 1        | 1        |          |          | WC       | 197        |
| <b>408</b> | <b>0</b>  |     | <b>0</b> | <b>0</b> | <b>1</b> | <b>0</b> | <b>0</b> | <b>0</b> | <b>0</b> | <b>0</b>   |
|            |           |     |          | 0        | 1        |          |          |          |          | 0          |
| <b>409</b> | <b>0</b>  |     | <b>0</b> | <b>0</b> | <b>1</b> | <b>0</b> | <b>0</b> | <b>0</b> | <b>0</b> | <b>0</b>   |
|            |           |     |          | 0        | 1        |          |          |          |          | 0          |
| <b>410</b> | <b>1</b>  |     | <b>0</b> | <b>1</b> | <b>0</b> | <b>0</b> | <b>1</b> | <b>0</b> | <b>1</b> | <b>0</b>   |
|            | GA        | 585 |          | 1        | 0        |          | 1        |          | KK       | 195        |
| <b>15</b>  | <b>0</b>  |     | <b>0</b> | <b>0</b> | <b>0</b> | <b>0</b> | <b>0</b> | <b>0</b> | <b>0</b> | <b>0</b>   |
|            |           |     |          |          |          |          |          |          |          | 0          |
| <b>16</b>  | <b>1</b>  |     | <b>0</b> | <b>1</b> | <b>0</b> | <b>0</b> | <b>1</b> | <b>0</b> | <b>1</b> | <b>0</b>   |
|            | TC        | 270 |          | 1        | 0        |          | 1        |          | DD       | 90         |

|              |           |     |          |          |          |          |          |          |          |          |
|--------------|-----------|-----|----------|----------|----------|----------|----------|----------|----------|----------|
| <b>17</b>    | <b>2</b>  |     | <b>0</b> | <b>2</b> | <b>0</b> | <b>1</b> | <b>1</b> | <b>0</b> | <b>2</b> | <b>0</b> |
|              | AG        | 215 |          | 1        | 0        | 1        |          |          | QR       | 72       |
|              | TC        | 282 |          | 1        | 0        |          | 1        |          | AA       | 94       |
| <b>18</b>    | <b>3</b>  |     | <b>1</b> | <b>0</b> | <b>2</b> | <b>2</b> | <b>0</b> | <b>0</b> | <b>3</b> | <b>0</b> |
|              | INSERTION | 278 | 1        | 0        | 0        |          |          |          |          | 93       |
|              | GC        | 335 |          | 0        | 1        | 1        |          |          | CS       | 112      |
|              | GC        | 424 |          | 0        | 1        | 1        |          |          | DH       | 142,0    |
| <b>19</b>    | <b>1</b>  |     | <b>0</b> | <b>0</b> | <b>1</b> | <b>0</b> | <b>0</b> | <b>1</b> | <b>1</b> | <b>0</b> |
|              | AT        | 526 |          | 0        | 1        |          |          | 1        | STOP     | 176,0    |
| <b>19BIS</b> | <b>0</b>  |     | <b>0</b> | <b>0</b> | <b>0</b> | <b>0</b> | <b>0</b> | <b>0</b> | <b>0</b> | <b>0</b> |
|              |           |     |          |          |          |          |          |          |          | 0        |
| <b>20</b>    | <b>2</b>  |     | <b>0</b> | <b>2</b> | <b>0</b> | <b>1</b> | <b>0</b> | <b>1</b> | <b>2</b> | <b>0</b> |
|              | GA        | 185 |          | 1        | 0        |          |          | 1        | STOP     | 62       |
|              | CT        | 343 |          | 1        | 0        | 1        |          |          | HY       | 115,0    |
| <b>21</b>    | <b>0</b>  |     | <b>0</b> | <b>0</b> | <b>0</b> | <b>0</b> | <b>0</b> | <b>0</b> | <b>0</b> | <b>0</b> |
|              |           |     |          |          |          |          |          |          |          | 0        |
| <b>22</b>    | <b>0</b>  |     | <b>0</b> | <b>0</b> | <b>0</b> | <b>0</b> | <b>0</b> | <b>0</b> | <b>0</b> | <b>0</b> |
|              |           |     |          |          |          |          |          |          |          | 0        |
| <b>23</b>    | <b>1</b>  |     | <b>0</b> | <b>1</b> | <b>0</b> | <b>0</b> | <b>1</b> | <b>0</b> | <b>1</b> | <b>0</b> |
|              | TC        | 408 |          | 1        | 0        |          | 1        |          | FF       | 136      |
| <b>24</b>    | <b>1</b>  |     | <b>0</b> | <b>1</b> | <b>0</b> | <b>1</b> | <b>0</b> | <b>0</b> | <b>1</b> | <b>0</b> |
|              | GA        | 52  |          | 1        | 0        | 1        |          |          | VM       | 18,0     |
| <b>25</b>    | <b>1</b>  |     | <b>0</b> | <b>1</b> | <b>0</b> | <b>1</b> | <b>0</b> | <b>0</b> | <b>1</b> | <b>0</b> |
|              | GA        | 508 |          | 1        | 0        | 1        |          |          | VI       | 170,0    |
| <b>26</b>    | <b>2</b>  |     | <b>0</b> | <b>2</b> | <b>0</b> | <b>2</b> | <b>0</b> | <b>0</b> | <b>2</b> | <b>0</b> |
|              | GA        | 64  |          | 1        | 0        | 1        |          |          | AT       | 21,3     |
|              | GA        | 262 |          | 1        | 0        | 1        |          |          | VI       | 88,0     |
| <b>27</b>    | <b>1</b>  |     | <b>0</b> | <b>1</b> | <b>0</b> | <b>0</b> | <b>1</b> | <b>0</b> | <b>1</b> | <b>0</b> |
|              | TC        | 78  |          | 1        | 0        |          | 1        |          | DD       | 26       |
| <b>28</b>    | <b>2</b>  |     | <b>0</b> | <b>2</b> | <b>0</b> | <b>1</b> | <b>1</b> | <b>0</b> | <b>2</b> | <b>0</b> |

|           |          |     |          |          |          |          |          |          |          |          |
|-----------|----------|-----|----------|----------|----------|----------|----------|----------|----------|----------|
|           | AG       | 215 |          | 1        | 0        | 1        |          |          | QR       | 72       |
|           | TC       | 282 |          | 1        | 0        |          | 1        |          | AA       | 94       |
| <b>29</b> | <b>0</b> |     | <b>0</b> | <b>0</b> | <b>0</b> | <b>0</b> | <b>0</b> | <b>0</b> | <b>0</b> | <b>0</b> |
|           |          |     |          |          |          |          |          |          |          | 0        |
| <b>30</b> | <b>5</b> |     | <b>0</b> | <b>2</b> | <b>3</b> | <b>4</b> | <b>1</b> | <b>0</b> | <b>5</b> | <b>0</b> |
|           | AT       | 141 |          | 0        | 1        | 1        |          |          | KN       | 47       |
|           | GA       | 156 |          | 1        | 0        |          | 1        |          | KK       | 52       |
|           | AT       | 213 |          | 0        | 1        | 1        |          |          | KN       | 71       |
|           | CT       | 281 |          | 1        | 0        | 1        |          |          | AV       | 94       |
|           | CA       | 343 |          | 0        | 1        | 1        |          |          | HN       | 115,0    |
| <b>31</b> | <b>2</b> |     | <b>0</b> | <b>0</b> | <b>2</b> | <b>1</b> | <b>1</b> | <b>0</b> | <b>2</b> | <b>0</b> |
|           | AT       | 174 |          | 0        | 1        |          | 1        |          | SS       | 58       |
|           | TA       | 602 |          | 0        | 1        | 1        |          |          | LQ       | 201      |
| <b>32</b> | <b>3</b> |     | <b>0</b> | <b>1</b> | <b>2</b> | <b>3</b> | <b>0</b> | <b>0</b> | <b>3</b> | <b>0</b> |
|           | AC       | 528 |          | 0        | 1        | 1        |          |          | KN       | 176      |
|           | GC       | 565 |          | 0        | 1        | 1        |          |          | AP       | 189,0    |
|           | AG       | 641 |          | 1        | 0        | 1        |          |          | DG       | 214      |

|    |    |
|----|----|
| TA | 5  |
| AT | 8  |
| CG | 0  |
| GC | 4  |
| TG | 0  |
| GT | 3  |
| GA | 14 |
| AG | 6  |
| CA | 2  |
| AC | 2  |
| TC | 8  |
| CT | 4  |

INSERTION 4  
 DELETION 0

| Library sample  | VPg LOW   |             |       |            |              |    |   |      |                 |             |
|-----------------|-----------|-------------|-------|------------|--------------|----|---|------|-----------------|-------------|
| total mutations | 25        | 0           | 1     | 15         | 10           | 16 | 8 | 0    |                 | 0           |
| Mutant ref      | Mutations | nt Position | INDEL | Transition | Transversion | NS | S | STOP | aa substitution | aa Position |
| 1               | 0         |             | 0     | 0          | 0            | 0  | 0 | 0    | 0               | 0           |
| 2               | 1         |             | 0     | 1          | 0            | 0  | 1 | 0    | 1               | 0           |
|                 | GA        | 354         |       | 1          | 0            |    | 1 |      | LL              | 118         |
| 3               | 0         |             | 0     | 0          | 0            | 0  | 0 | 0    | 0               | 0           |
| 4               | 2         |             | 0     | 2          | 0            | 1  | 1 | 0    | 2               | 0           |
|                 | GA        | 50          |       | 1          | 0            | 1  |   |      | RH              | 17          |
|                 | CT        | 78          |       | 1          | 0            |    | 1 |      | DD              | 26          |
| 5               | 0         |             | 0     | 0          | 0            | 0  | 0 | 0    | 0               | 0           |
| 6               | 1         |             | 0     | 1          | 0            | 1  | 0 | 0    | 1               | 0           |
|                 | GA        | 406         |       | 1          | 0            | 1  |   |      | AT              | 136,0       |
| 7               | 5         |             | 0     | 1          | 4            | 3  | 2 | 0    | 5               | 0           |
|                 | AG        | 163         |       | 1          | 0            | 1  |   |      | KE              | 55,0        |
|                 | AT        | 249         |       | 0          | 1            |    | 1 |      | AA              | 83          |
|                 | TA        | 273         |       | 0          | 1            |    | 1 |      | AA              | 91          |
|                 | TA        | 375         |       | 0          | 1            | 1  |   |      | HQ              | 125         |
|                 | GC        | 406         |       | 0          | 1            | 1  |   |      | AP              | 136,0       |
| 8               | 2         |             | 1     | 1          | 1            | 0  | 1 | 0    | 2               | 0           |
|                 | AG        | 291         |       | 1          | 0            |    | 1 |      | QQ              | 97          |
|                 | INSERTION | 462         | 1     | 0          | 1            |    |   |      |                 | 154         |

|           |          |     |          |          |          |          |          |          |          |          |          |
|-----------|----------|-----|----------|----------|----------|----------|----------|----------|----------|----------|----------|
| <b>9</b>  | <b>0</b> |     | <b>0</b> | <b>0</b> | <b>0</b> | <b>0</b> | <b>0</b> | <b>0</b> | <b>0</b> | <b>0</b> | <b>0</b> |
|           |          |     |          |          |          |          |          |          |          |          | 0        |
| <b>10</b> | <b>0</b> |     | <b>0</b> | <b>0</b> | <b>0</b> | <b>0</b> | <b>0</b> | <b>0</b> | <b>0</b> | <b>0</b> | <b>0</b> |
|           |          |     |          |          |          |          |          |          |          |          | 0        |
| <b>11</b> | <b>2</b> |     | <b>0</b> | <b>0</b> | <b>2</b> | <b>2</b> | <b>0</b> | <b>0</b> | <b>2</b> | <b>0</b> | <b>0</b> |
|           | CA       | 223 |          | 0        | 1        | 1        |          |          | QK       |          | 75,0     |
|           | CA       | 242 |          | 0        | 1        | 1        |          |          | TN       |          | 81       |
| <b>12</b> | <b>0</b> |     | <b>0</b> | <b>0</b> | <b>0</b> | <b>0</b> | <b>0</b> | <b>0</b> | <b>0</b> | <b>0</b> | <b>0</b> |
|           |          |     |          |          |          |          |          |          |          |          | 0        |
| <b>13</b> | <b>1</b> |     | <b>0</b> | <b>1</b> | <b>0</b> | <b>1</b> | <b>0</b> | <b>0</b> | <b>1</b> | <b>0</b> | <b>0</b> |
|           | GA       | 334 |          | 1        | 0        | 1        |          |          | EK       |          | 112,0    |
| <b>14</b> | <b>0</b> |     | <b>0</b> | <b>0</b> | <b>0</b> | <b>0</b> | <b>0</b> | <b>0</b> | <b>0</b> | <b>0</b> | <b>0</b> |
|           |          |     |          |          |          |          |          |          |          |          | 0        |
| <b>15</b> | <b>0</b> |     | <b>0</b> | <b>0</b> | <b>0</b> | <b>0</b> | <b>0</b> | <b>0</b> | <b>0</b> | <b>0</b> | <b>0</b> |
|           |          |     |          |          |          |          |          |          |          |          | 0        |
| <b>16</b> | <b>1</b> |     | <b>0</b> | <b>1</b> | <b>0</b> | <b>1</b> | <b>0</b> | <b>0</b> | <b>1</b> | <b>0</b> | <b>0</b> |
|           | GA       | 445 |          | 1        | 0        | 1        |          |          | VI       |          | 149,0    |
| <b>17</b> | <b>1</b> |     | <b>0</b> | <b>1</b> | <b>0</b> | <b>1</b> | <b>0</b> | <b>0</b> | <b>1</b> | <b>0</b> | <b>0</b> |
|           | CT       | 373 |          | 1        | 0        | 1        |          |          | HY       |          | 125,0    |
| <b>18</b> | <b>1</b> |     | <b>0</b> | <b>1</b> | <b>0</b> | <b>1</b> | <b>0</b> | <b>0</b> | <b>1</b> | <b>0</b> | <b>0</b> |
|           | GA       | 50  |          | 1        | 0        | 1        |          |          | RH       |          | 17       |
| <b>19</b> | <b>0</b> |     | <b>0</b> | <b>0</b> | <b>0</b> | <b>0</b> | <b>0</b> | <b>0</b> | <b>0</b> | <b>0</b> | <b>0</b> |
|           |          |     |          |          |          |          |          |          |          |          | 0        |
| <b>20</b> | <b>0</b> |     | <b>0</b> | <b>0</b> | <b>0</b> | <b>0</b> | <b>0</b> | <b>0</b> | <b>0</b> | <b>0</b> | <b>0</b> |
|           |          |     |          |          |          |          |          |          |          |          | 0        |
| <b>21</b> | <b>1</b> |     | <b>0</b> | <b>1</b> | <b>0</b> | <b>0</b> | <b>1</b> | <b>0</b> | <b>0</b> | <b>0</b> | <b>0</b> |
|           | GA       | 354 |          | 1        | 0        |          | 1        |          | LL       |          | 118      |
| <b>22</b> | <b>1</b> |     | <b>0</b> | <b>0</b> | <b>1</b> | <b>1</b> | <b>0</b> | <b>0</b> | <b>1</b> | <b>0</b> | <b>0</b> |
|           | CA       | 515 |          | 0        | 1        | 1        |          |          | AD       |          | 172      |
| <b>23</b> | <b>1</b> |     | <b>0</b> | <b>1</b> | <b>0</b> | <b>1</b> | <b>0</b> | <b>0</b> | <b>1</b> | <b>0</b> | <b>0</b> |

|           |          |     |          |          |          |          |          |          |          |          |          |
|-----------|----------|-----|----------|----------|----------|----------|----------|----------|----------|----------|----------|
|           | CT       | 559 |          | 1        | 0        | 1        |          |          |          | HY       | 187,0    |
| <b>24</b> | <b>1</b> |     | <b>0</b> | <b>1</b> | <b>0</b> | <b>1</b> | <b>0</b> | <b>0</b> | <b>0</b> | <b>1</b> | <b>0</b> |
|           | GA       | 232 |          | 1        | 0        | 1        |          |          |          | DN       | 78,0     |
| <b>25</b> | <b>0</b> |     | <b>0</b> | <b>0</b> | <b>0</b> | <b>0</b> | <b>0</b> | <b>0</b> | <b>0</b> | <b>0</b> | <b>0</b> |
|           |          |     |          |          |          |          |          |          |          |          | 0        |
| <b>26</b> | <b>0</b> |     | <b>0</b> | <b>0</b> | <b>0</b> | <b>0</b> | <b>0</b> | <b>0</b> | <b>0</b> | <b>0</b> | <b>0</b> |
|           |          |     |          |          |          |          |          |          |          |          | 0        |
| <b>27</b> | <b>0</b> |     | <b>0</b> | <b>0</b> | <b>0</b> | <b>0</b> | <b>0</b> | <b>0</b> | <b>0</b> | <b>0</b> | <b>0</b> |
|           |          |     |          |          |          |          |          |          |          |          | 0        |
| <b>29</b> | <b>0</b> |     | <b>0</b> | <b>0</b> | <b>0</b> | <b>0</b> | <b>0</b> | <b>0</b> | <b>0</b> | <b>0</b> | <b>0</b> |
|           |          |     |          |          |          |          |          |          |          |          | 0        |
| <b>30</b> | <b>3</b> |     | <b>0</b> | <b>1</b> | <b>2</b> | <b>1</b> | <b>2</b> | <b>0</b> | <b>0</b> | <b>3</b> | <b>0</b> |
|           | TA       | 67  |          | 0        | 1        | 1        |          |          |          | FI       | 23,0     |
|           | AT       | 456 |          | 0        | 1        |          | 1        |          |          | KN       | 152      |
|           | AG       | 552 |          | 1        | 0        |          | 1        |          |          | EE       | 184      |
| <b>31</b> | <b>0</b> |     | <b>0</b> | <b>0</b> | <b>0</b> | <b>0</b> | <b>0</b> | <b>0</b> | <b>0</b> | <b>0</b> | <b>0</b> |
|           |          |     |          |          |          |          |          |          |          |          | 0        |
| <b>32</b> | <b>1</b> |     | <b>0</b> | <b>1</b> | <b>0</b> | <b>1</b> | <b>0</b> | <b>0</b> | <b>0</b> | <b>1</b> | <b>0</b> |
|           | CT       | 206 |          | 1        | 0        | 1        |          |          |          | TI       | 69       |

TA 3  
 AT 2  
 CG 0  
 GC 1  
 TG 0  
 GT 0  
 GA 8  
 AG 3  
 CA 3  
 AC 0

TC 0  
 CT 4  
 INSERTION 1  
 DELETION 0

**Library sample eIF4E med**

| total mutations |           | 78          | 0     | 60         | 18           | 62 | 14 | 2    | 0               |             |
|-----------------|-----------|-------------|-------|------------|--------------|----|----|------|-----------------|-------------|
| Mutant ref      | Mutations | nt Position | INDEL | Transition | Transversion | NS | S  | STOP | aa substitution | aa Position |
| 1               | 0         |             | 0     | 0          | 0            | 0  | 0  | 0    | 0               | 0           |
| 2               | 1         |             | 0     | 0          | 1            | 1  | 0  | 0    | 1               | 0           |
|                 | GT        | 540         |       | 0          | 1            | 1  |    |      | WC              | 180         |
| 3               | 3         |             | 0     | 2          | 1            | 3  | 0  | 0    | 3               | 0           |
|                 | CT        | 138         |       | 1          | 0            | 1  |    |      | SS              | 46          |
|                 | CA        | 436         |       | 0          | 1            | 1  |    |      | LI              | 146,0       |
|                 | CT        | 551         |       | 1          | 0            | 1  |    |      | AV              | 184         |
| 4               | 5         |             | 0     | 4          | 1            | 4  | 1  | 0    | 5               | 0           |
|                 | GA        | 46          |       | 1          | 0            | 1  |    |      | EK              | 16,0        |
|                 | GA        | 123         |       | 1          | 0            |    | 1  |      | TT              | 41          |
|                 | AT        | 216         |       | 0          | 1            | 1  |    |      | QH              | 72          |
|                 | GA        | 373         |       | 1          | 0            | 1  |    |      | VI              | 125,0       |
|                 | AG        | 560         |       | 1          | 0            | 1  |    |      | EG              | 187         |
| 5               | 1         |             | 0     | 1          | 0            | 0  | 1  | 0    | 1               | 0           |
|                 | GA        | 168         |       | 1          | 0            |    | 1  |      | EE              | 56          |
| 6               | 3         |             | 0     | 3          | 0            | 2  | 1  | 0    | 3               | 0           |
|                 | CT        | 161         |       | 1          | 0            | 1  |    |      | PL              | 54          |
|                 | CT        | 301         |       | 1          | 0            | 1  |    |      | PS              | 101,0       |
|                 | CT        | 576         |       | 1          | 0            |    | 1  |      | SS              | 192         |
| 7               | 3         |             | 0     | 3          | 0            | 1  | 2  | 0    | 3               | 0           |



|           |          |     |          |          |          |          |          |          |          |          |
|-----------|----------|-----|----------|----------|----------|----------|----------|----------|----------|----------|
|           | GA       | 431 |          | 1        | 0        | 1        |          |          | SN       | 144      |
|           | TC       | 618 |          | 1        | 0        |          | 1        |          | SS       | 206      |
|           | CT       | 654 |          | 1        | 0        |          | 1        |          | LL       | 218      |
| <b>8</b>  | <b>3</b> |     | <b>0</b> | <b>2</b> | <b>1</b> | <b>2</b> | <b>0</b> | <b>1</b> | <b>3</b> | <b>0</b> |
|           | GA       | 185 |          | 1        | 0        |          |          | 1        | STOP     | 62       |
|           | GT       | 581 |          | 0        | 1        | 1        |          |          | GV       | 194      |
|           | TC       | 625 |          | 1        | 0        | 1        |          |          | FL       | 209,0    |
| <b>9</b>  | <b>1</b> |     | <b>0</b> | <b>0</b> | <b>1</b> | <b>1</b> | <b>0</b> | <b>0</b> | <b>1</b> | <b>0</b> |
|           | AT       | 242 |          | 0        | 1        | 1        |          |          | NI       | 81       |
| <b>10</b> | <b>3</b> |     | <b>0</b> | <b>3</b> | <b>0</b> | <b>3</b> | <b>0</b> | <b>0</b> | <b>3</b> | <b>0</b> |
|           | GA       | 190 |          | 1        | 0        | 1        |          |          | DN       | 64,0     |
|           | GA       | 496 |          | 1        | 0        | 1        |          |          | AT       | 166,0    |
|           | GA       | 508 |          | 1        | 0        | 1        |          |          | VI       | 170,0    |
| <b>11</b> | <b>0</b> |     | <b>0</b> | <b>0</b> | <b>0</b> | <b>0</b> | <b>0</b> | <b>0</b> | <b>0</b> | <b>0</b> |
|           |          |     |          |          |          |          |          |          |          | 0        |
| <b>12</b> | <b>3</b> |     | <b>0</b> | <b>2</b> | <b>1</b> | <b>3</b> | <b>0</b> | <b>0</b> | <b>3</b> | <b>0</b> |
|           | CT       | 260 |          | 1        | 0        | 1        |          |          | TI       | 87       |
|           | CT       | 323 |          | 1        | 0        | 1        |          |          | AV       | 108      |
|           | CA       | 422 |          | 0        | 1        | 1        |          |          | SY       | 141      |
| <b>13</b> | <b>1</b> |     | <b>0</b> | <b>1</b> | <b>0</b> | <b>0</b> | <b>1</b> | <b>0</b> | <b>1</b> | <b>0</b> |
|           | GA       | 537 |          | 1        | 0        |          | 1        |          | LL       | 179      |
| <b>14</b> | <b>0</b> |     | <b>0</b> | <b>0</b> | <b>0</b> | <b>0</b> | <b>0</b> | <b>0</b> | <b>0</b> | <b>0</b> |
|           |          |     |          |          |          |          |          |          |          | 0        |
| <b>15</b> | <b>8</b> |     | <b>0</b> | <b>6</b> | <b>2</b> | <b>6</b> | <b>2</b> | <b>0</b> | <b>8</b> | <b>0</b> |
|           | CT       | 113 |          | 1        | 0        | 1        |          |          | TI       | 38       |
|           | GA       | 217 |          | 1        | 0        | 1        |          |          | AT       | 73,0     |
|           | GC       | 244 |          | 0        | 1        | 1        |          |          | VL       | 82,0     |
|           | TC       | 293 |          | 1        | 0        | 1        |          |          | IT       | 98       |
|           | TC       | 423 |          | 1        | 0        |          | 1        |          | SS       | 141      |
|           | GA       | 585 |          | 1        | 0        |          | 1        |          | KK       | 195      |

|           |          |     |          |          |          |          |          |          |          |          |
|-----------|----------|-----|----------|----------|----------|----------|----------|----------|----------|----------|
|           | GA       | 613 |          | 1        | 0        | 1        |          |          | DN       | 205,0    |
|           | GC       | 643 |          | 0        | 1        | 1        |          |          | AP       | 215,0    |
| <b>16</b> | <b>3</b> |     | <b>0</b> | <b>3</b> | <b>0</b> | <b>1</b> | <b>2</b> | <b>0</b> | <b>3</b> | <b>0</b> |
|           | CT       | 301 |          | 1        | 0        | 1        |          |          | PS       | 101,0    |
|           | CT       | 432 |          | 1        | 0        |          | 1        |          | SS       | 144      |
|           | TC       | 504 |          | 1        | 0        |          | 1        |          | VV       | 168      |
| <b>17</b> | <b>2</b> |     | <b>0</b> | <b>2</b> | <b>0</b> | <b>2</b> | <b>0</b> | <b>0</b> | <b>2</b> | <b>0</b> |
|           | GA       | 70  |          | 1        | 0        | 1        |          |          | EK       | 24,0     |
|           | CT       | 122 |          | 1        | 0        | 1        |          |          | TM       | 41       |
| <b>18</b> | <b>0</b> |     | <b>0</b> | <b>0</b> | <b>0</b> | <b>0</b> | <b>0</b> | <b>0</b> | <b>0</b> | <b>0</b> |
|           |          |     |          |          |          |          |          |          |          | 0,0      |
| <b>19</b> | <b>2</b> |     | <b>0</b> | <b>2</b> | <b>0</b> | <b>2</b> | <b>0</b> | <b>0</b> | <b>2</b> | <b>0</b> |
|           | CT       | 251 |          | 1        | 0        | 1        |          |          | TI       | 84       |
|           | GA       | 316 |          | 1        | 0        | 1        |          |          | VM       | 106,0    |
| <b>20</b> | <b>1</b> |     | <b>0</b> | <b>1</b> | <b>0</b> | <b>1</b> | <b>0</b> | <b>0</b> | <b>1</b> | <b>0</b> |
|           | GA       | 325 |          | 1        | 0        | 1        |          |          | DN       | 109,0    |
| <b>21</b> | <b>4</b> |     | <b>0</b> | <b>2</b> | <b>2</b> | <b>3</b> | <b>1</b> | <b>0</b> | <b>4</b> | <b>0</b> |
|           | TA       | 120 |          | 0        | 1        | 1        |          |          | DE       | 40       |
|           | AT       | 321 |          | 0        | 1        |          | 1        |          | GG       | 107      |
|           | GA       | 431 |          | 1        | 0        | 1        |          |          | SN       | 144      |
|           | GA       | 550 |          | 1        | 0        | 1        |          |          | AT       | 184,0    |
| <b>22</b> | <b>2</b> |     | <b>0</b> | <b>2</b> | <b>0</b> | <b>0</b> | <b>1</b> | <b>1</b> | <b>2</b> | <b>0</b> |
|           | GA       | 185 |          | 1        | 0        |          |          | 1        | STOP     | 62       |
|           | GA       | 309 |          | 1        | 0        |          | 1        |          | KK       | 103      |
| <b>23</b> | <b>2</b> |     | <b>0</b> | <b>1</b> | <b>1</b> | <b>2</b> | <b>0</b> | <b>0</b> | <b>2</b> | <b>0</b> |
|           | AG       | 41  |          | 1        | 0        | 1        |          |          | EG       | 14       |
|           | GC       | 230 |          | 0        | 1        | 1        |          |          | ST       | 77       |
| <b>24</b> | <b>0</b> |     | <b>0</b> | <b>0</b> | <b>0</b> | <b>0</b> | <b>0</b> | <b>0</b> | <b>0</b> | <b>0</b> |
|           |          |     |          |          |          |          |          |          |          | 0        |
| <b>25</b> | <b>3</b> |     | <b>0</b> | <b>3</b> | <b>0</b> | <b>2</b> | <b>1</b> | <b>0</b> | <b>3</b> | <b>0</b> |

|           |          |     |          |          |          |          |          |          |          |          |
|-----------|----------|-----|----------|----------|----------|----------|----------|----------|----------|----------|
|           | GA       | 85  |          | 1        | 0        | 1        |          |          | VI       | 29,0     |
|           | GA       | 379 |          | 1        | 0        | 1        |          |          | AT       | 127,0    |
|           | TC       | 423 |          | 1        | 0        |          | 1        |          | SS       | 141      |
| <b>26</b> | <b>5</b> |     | <b>0</b> | <b>2</b> | <b>3</b> | <b>5</b> | <b>0</b> | <b>0</b> | <b>5</b> | <b>0</b> |
|           | CT       | 125 |          | 1        | 0        | 1        |          |          | TM       | 42       |
|           | CT       | 251 |          | 1        | 0        | 1        |          |          | TI       | 84       |
|           | CA       | 281 |          | 0        | 1        | 1        |          |          | AD       | 94       |
|           | TA       | 572 |          | 0        | 1        | 1        |          |          | VD       | 191      |
|           | AT       | 647 |          | 0        | 1        | 1        |          |          | KM       | 216      |
| <b>27</b> | <b>1</b> |     | <b>0</b> | <b>0</b> | <b>1</b> | <b>1</b> | <b>0</b> | <b>0</b> | <b>1</b> | <b>0</b> |
|           | CG       | 343 |          | 0        | 1        | 1        |          |          | HD       | 115,0    |
| <b>28</b> | <b>3</b> |     | <b>0</b> | <b>2</b> | <b>1</b> | <b>3</b> | <b>0</b> | <b>0</b> | <b>3</b> | <b>0</b> |
|           | AC       | 108 |          | 0        | 1        | 1        |          |          | ED       | 36       |
|           | CT       | 169 |          | 1        | 0        | 1        |          |          | HY       | 57,0     |
|           | GA       | 227 |          | 1        | 0        | 1        |          |          | GD       | 76       |
| <b>29</b> | <b>2</b> |     | <b>0</b> | <b>0</b> | <b>2</b> | <b>1</b> | <b>1</b> | <b>0</b> | <b>2</b> | <b>0</b> |
|           | AC       | 50  |          | 0        | 1        | 1        |          |          | KI       | 17       |
|           | TA       | 102 |          | 0        | 1        |          | 1        |          | II       | 34       |
| <b>30</b> | <b>5</b> |     | <b>0</b> | <b>5</b> | <b>0</b> | <b>5</b> | <b>0</b> | <b>0</b> | <b>5</b> | <b>0</b> |
|           | CT       | 65  |          | 1        | 0        | 1        |          |          | AV       | 22       |
|           | TC       | 253 |          | 1        | 0        | 1        |          |          | FL       | 85,0     |
|           | GA       | 305 |          | 1        | 0        | 1        |          |          | SN       | 102      |
|           | CT       | 497 |          | 1        | 0        | 1        |          |          | AV       | 166      |
|           | GA       | 520 |          | 1        | 0        | 1        |          |          | GR       | 174,0    |
| <b>31</b> | <b>5</b> |     | <b>0</b> | <b>5</b> | <b>0</b> | <b>5</b> | <b>0</b> | <b>0</b> | <b>5</b> | <b>0</b> |
|           | GA       | 79  |          | 1        | 0        | 1        |          |          | DN       | 27,0     |
|           | CT       | 161 |          | 1        | 0        | 1        |          |          | PL       | 54       |
|           | GA       | 313 |          | 1        | 0        | 1        |          |          | VI       | 105,0    |
|           | CT       | 428 |          | 1        | 0        | 1        |          |          | TI       | 143      |
|           | CT       | 443 |          | 1        | 0        | 1        |          |          | TM       | 148      |

| <b>32</b> |    | <b>3</b> |  | <b>0</b> |   | <b>3</b> |  | <b>0</b> |  | <b>0</b> |  | <b>3</b> |    | <b>0</b> |  |
|-----------|----|----------|--|----------|---|----------|--|----------|--|----------|--|----------|----|----------|--|
|           | CT | 169      |  | 1        | 0 | 1        |  |          |  |          |  |          | HY | 57,0     |  |
|           | GA | 502      |  | 1        | 0 | 1        |  |          |  |          |  |          | VI | 168,0    |  |
|           | AG | 646      |  | 1        | 0 | 1        |  |          |  |          |  |          | KE | 216,0    |  |
| TA        |    | 3        |  |          |   |          |  |          |  |          |  |          |    |          |  |
| AT        |    | 4        |  |          |   |          |  |          |  |          |  |          |    |          |  |
| CG        |    | 1        |  |          |   |          |  |          |  |          |  |          |    |          |  |
| GC        |    | 3        |  |          |   |          |  |          |  |          |  |          |    |          |  |
| TG        |    | 0        |  |          |   |          |  |          |  |          |  |          |    |          |  |
| GT        |    | 2        |  |          |   |          |  |          |  |          |  |          |    |          |  |
| GA        |    | 28       |  |          |   |          |  |          |  |          |  |          |    |          |  |
| AG        |    | 3        |  |          |   |          |  |          |  |          |  |          |    |          |  |
| CA        |    | 3        |  |          |   |          |  |          |  |          |  |          |    |          |  |
| AC        |    | 2        |  |          |   |          |  |          |  |          |  |          |    |          |  |
| TC        |    | 7        |  |          |   |          |  |          |  |          |  |          |    |          |  |
| CT        |    | 22       |  |          |   |          |  |          |  |          |  |          |    |          |  |
| INSERTION |    | 0        |  |          |   |          |  |          |  |          |  |          |    |          |  |
| DELETION  |    | 0        |  |          |   |          |  |          |  |          |  |          |    |          |  |

| <b>Library sample</b>  | <b>VPg MED</b>   |                    |              |                   |                     |           |          |             |                        |                    |
|------------------------|------------------|--------------------|--------------|-------------------|---------------------|-----------|----------|-------------|------------------------|--------------------|
| <b>total mutations</b> | <b>66</b>        | <b>4</b>           | <b>31</b>    | <b>36</b>         | <b>41</b>           | <b>21</b> | <b>0</b> | <b>0</b>    | <b>0</b>               | <b>0</b>           |
| <b>Mutant ref</b>      | <b>Mutations</b> | <b>nt Position</b> | <b>INDEL</b> | <b>Transition</b> | <b>Transversion</b> | <b>NS</b> | <b>S</b> | <b>STOP</b> | <b>aa substitution</b> | <b>aa Position</b> |
| <b>312</b>             | <b>2</b>         |                    | <b>0</b>     | <b>2</b>          | <b>0</b>            | <b>1</b>  | <b>1</b> | <b>0</b>    | <b>2</b>               | <b>0</b>           |
|                        | GA               | 159                |              | 1                 | 0                   | 1         |          |             | MI                     | 53,0               |
|                        | TC               | 198                |              | 1                 | 0                   |           | 1        |             | FF                     | 66,0               |

|            |           |     |          |          |          |          |          |          |          |          |
|------------|-----------|-----|----------|----------|----------|----------|----------|----------|----------|----------|
| <b>311</b> | <b>2</b>  |     | <b>0</b> | <b>1</b> | <b>1</b> | <b>1</b> | <b>1</b> | <b>0</b> | <b>2</b> | <b>0</b> |
|            | TA        | 278 |          | 0        | 1        | 1        |          |          | IN       | 93,0     |
|            | TC        | 421 |          | 1        | 0        |          | 1        |          | LL       | 141,0    |
| <b>310</b> | <b>2</b>  |     | <b>1</b> | <b>0</b> | <b>2</b> | <b>1</b> | <b>0</b> | <b>0</b> | <b>2</b> | <b>0</b> |
|            | INSERTION | 223 | 1        | 0        | 1        |          |          |          |          | 74,3     |
|            | TA        | 300 |          | 0        | 1        | 1        |          |          | FL       | 100,0    |
| <b>308</b> | <b>2</b>  |     | <b>0</b> | <b>1</b> | <b>1</b> | <b>2</b> | <b>0</b> | <b>0</b> | <b>2</b> | <b>0</b> |
|            | GA        | 88  |          | 1        | 0        | 1        |          |          | DN       | 30,0     |
|            | AT        | 431 |          | 0        | 1        | 1        |          |          | HL       | 144,0    |
| <b>307</b> | <b>4</b>  |     | <b>0</b> | <b>2</b> | <b>2</b> | <b>1</b> | <b>3</b> | <b>0</b> | <b>4</b> | <b>0</b> |
|            | AG        | 258 |          | 1        | 0        |          | 1        |          | EE       | 86,0     |
|            | GT        | 366 |          | 0        | 1        |          | 1        |          | TT       | 122,0    |
|            | GA        | 414 |          | 1        | 0        |          | 1        |          | KK       | 138,0    |
|            | GT        | 509 |          | 0        | 1        | 1        |          |          | GV       | 170,0    |
| <b>305</b> | <b>3</b>  |     | <b>0</b> | <b>2</b> | <b>1</b> | <b>1</b> | <b>2</b> | <b>0</b> | <b>3</b> | <b>0</b> |
|            | TC        | 39  |          | 1        | 0        |          | 1        |          | FF       | 13,0     |
|            | CA        | 186 |          | 0        | 1        | 1        |          |          | NK       | 62,0     |
|            | GA        | 309 |          | 1        | 0        |          | 1        |          | VV       | 103,0    |
| <b>304</b> | <b>5</b>  |     | <b>0</b> | <b>1</b> | <b>4</b> | <b>3</b> | <b>2</b> | <b>0</b> | <b>5</b> | <b>0</b> |
|            | GT        | 154 |          | 0        | 1        | 1        |          |          | GC       | 52,0     |
|            | TA        | 243 |          | 0        | 1        |          | 1        |          | TT       | 81,0     |
|            | GT        | 318 |          | 0        | 1        | 1        |          |          | KN       | 106,0    |
|            | TA        | 425 |          | 0        | 1        | 1        |          |          | MK       | 142,0    |
|            | GA        | 498 |          | 1        | 0        |          | 1        |          | LL       | 166,0    |
| <b>303</b> | <b>4</b>  |     | <b>0</b> | <b>1</b> | <b>3</b> | <b>4</b> | <b>0</b> | <b>0</b> | <b>4</b> | <b>0</b> |
|            | CA        | 49  |          | 0        | 1        | 1        |          |          | RS       | 17,0     |
|            | AG        | 145 |          | 1        | 0        | 1        |          |          | TA       | 49,0     |
|            | GT        | 170 |          | 0        | 1        | 1        |          |          | SI       | 57,0     |
|            | TA        | 467 |          | 0        | 1        | 1        |          |          | IN       | 156,0    |
| <b>302</b> | <b>3</b>  |     | <b>1</b> | <b>2</b> | <b>1</b> | <b>2</b> | <b>0</b> | <b>0</b> | <b>3</b> | <b>0</b> |

|            |           |     |          |          |          |          |          |          |          |          |
|------------|-----------|-----|----------|----------|----------|----------|----------|----------|----------|----------|
|            | TC        | 95  |          | 1        | 0        | 1        |          |          | IT       | 32,0     |
|            | AG        | 290 |          | 1        | 0        | 1        |          |          | QR       | 97,0     |
|            | INSERTION | 546 | 1        | 0        | 1        |          |          |          |          | 182,0    |
| <b>301</b> | <b>3</b>  |     | <b>0</b> | <b>0</b> | <b>3</b> | <b>3</b> | <b>0</b> | <b>0</b> | <b>3</b> | <b>0</b> |
|            | TA        | 254 |          | 0        | 1        | 1        |          |          | IK       | 85,0     |
|            | AT        | 473 |          | 0        | 1        | 1        |          |          | KI       | 158,0    |
|            | AT        | 533 |          | 0        | 1        | 1        |          |          | KM       | 178,0    |
| <b>330</b> | <b>6</b>  |     | <b>0</b> | <b>2</b> | <b>4</b> | <b>5</b> | <b>1</b> | <b>0</b> | <b>6</b> | <b>0</b> |
|            | TA        | 234 |          | 0        | 1        | 1        |          |          | DE       | 78,0     |
|            | AT        | 367 |          | 0        | 1        | 1        |          |          | SC       | 123,0    |
|            | TA        | 378 |          | 0        | 1        |          | 1        |          | AA       | 126,0    |
|            | AG        | 380 |          | 1        | 0        | 1        |          |          | YC       | 127,0    |
|            | AT        | 431 |          | 0        | 1        | 1        |          |          | HL       | 144,0    |
|            | GA        | 535 |          | 1        | 0        | 1        |          |          | DN       | 179,0    |
| <b>329</b> | <b>5</b>  |     | <b>0</b> | <b>4</b> | <b>1</b> | <b>3</b> | <b>2</b> | <b>0</b> | <b>5</b> | <b>0</b> |
|            | CT        | 186 |          | 1        | 0        |          | 1        |          | NN       | 62,0     |
|            | AG        | 313 |          | 1        | 0        | 1        |          |          | RG       | 105,0    |
|            | AT        | 326 |          | 0        | 1        | 1        |          |          | EV       | 109,0    |
|            | GA        | 366 |          | 1        | 0        |          | 1        |          | TT       | 122,0    |
|            | AG        | 413 |          | 1        | 0        | 1        |          |          | KR       | 138,0    |
| <b>328</b> | <b>3</b>  |     | <b>0</b> | <b>2</b> | <b>1</b> | <b>2</b> | <b>1</b> | <b>0</b> | <b>3</b> | <b>0</b> |
|            | TA        | 108 |          | 0        | 1        | 1        |          |          | FL       | 36,0     |
|            | GA        | 354 |          | 1        | 0        |          | 1        |          | LL       | 118,0    |
|            | CT        | 365 |          | 1        | 0        | 1        |          |          | TM       | 122,0    |
| <b>326</b> | <b>4</b>  |     | <b>0</b> | <b>1</b> | <b>3</b> | <b>3</b> | <b>1</b> | <b>0</b> | <b>4</b> | <b>0</b> |
|            | CA        | 147 |          | 0        | 1        |          | 1        |          | TT       | 49,0     |
|            | CG        | 149 |          | 0        | 1        | 1        |          |          | TR       | 50,0     |
|            | TA        | 268 |          | 0        | 1        | 1        |          |          | YN       | 90,0     |
|            | CT        | 343 |          | 1        | 0        | 1        |          |          | PS       | 115,0    |
| <b>325</b> | <b>0</b>  |     | <b>0</b> | <b>0</b> | <b>1</b> | <b>0</b> | <b>0</b> | <b>0</b> | <b>0</b> | <b>0</b> |

|            |           |     |          |          |          |          |          |          |          |          |
|------------|-----------|-----|----------|----------|----------|----------|----------|----------|----------|----------|
|            |           |     |          | 0        | 1        |          |          |          |          |          |
| <b>324</b> | <b>5</b>  |     | <b>1</b> | <b>3</b> | <b>2</b> | <b>2</b> | <b>2</b> | <b>0</b> | <b>5</b> | <b>0</b> |
|            | INSERTION | 199 | 1        | 0        | 1        |          |          |          |          | 66,3     |
|            | GC        | 247 |          | 0        | 1        | 1        |          |          | AP       | 83,0     |
|            | AG        | 438 |          | 1        | 0        |          | 1        |          | PP       | 146,0    |
|            | CT        | 496 |          | 1        | 0        |          | 1        |          | LL       | 166,0    |
|            | AG        | 544 |          | 1        | 0        | 1        |          |          | KE       | 182,0    |
| <b>323</b> | <b>3</b>  |     | <b>0</b> | <b>1</b> | <b>2</b> | <b>3</b> | <b>0</b> | <b>0</b> | <b>3</b> | <b>0</b> |
|            | GT        | 122 |          | 0        | 1        | 1        |          |          | RM       | 41,0     |
|            | AT        | 362 |          | 0        | 1        | 1        |          |          | NI       | 121,0    |
|            | CT        | 511 |          | 1        | 0        | 1        |          |          | PS       | 171,0    |
| <b>322</b> | <b>2</b>  |     | <b>1</b> | <b>0</b> | <b>2</b> | <b>1</b> | <b>0</b> | <b>0</b> | <b>2</b> | <b>0</b> |
|            | TA        | 211 |          | 0        | 1        | 1        |          |          | YN       | 71,0     |
|            | DELETION  | 411 | 1        | 0        | 1        |          |          |          |          | 137,0    |
| <b>321</b> | <b>6</b>  |     | <b>0</b> | <b>5</b> | <b>1</b> | <b>2</b> | <b>4</b> | <b>0</b> | <b>6</b> | <b>0</b> |
|            | AG        | 93  |          | 1        | 0        |          | 1        |          | TT       | 31,0     |
|            | TC        | 218 |          | 1        | 0        | 1        |          |          | FS       | 73,0     |
|            | CT        | 402 |          | 1        | 0        |          | 1        |          | DD       | 134,0    |
|            | AG        | 405 |          | 1        | 0        |          | 1        |          | KK       | 135,0    |
|            | CG        | 428 |          | 0        | 1        | 1        |          |          | PR       | 143,0    |
|            | GA        | 489 |          | 1        | 0        |          | 1        |          | EE       | 163,0    |
| <b>320</b> | <b>2</b>  |     | <b>0</b> | <b>1</b> | <b>1</b> | <b>1</b> | <b>1</b> | <b>0</b> | <b>2</b> | <b>0</b> |
|            | TA        | 360 |          | 0        | 1        | 1        |          |          | SR       | 120,0    |
|            | AG        | 405 |          | 1        | 0        |          | 1        |          | KK       | 135,0    |

TA 12  
AT 7  
CG 2  
GC 1  
TG 0

|           |    |
|-----------|----|
| GT        | 6  |
| GA        | 9  |
| AG        | 11 |
| CA        | 3  |
| AC        | 0  |
| TC        | 5  |
| CT        | 6  |
| INSERTION | 3  |
| DELETION  | 1  |

| Library sample  | eIF4E HIGH |             |          |            |              |          |          |          |                 |             |
|-----------------|------------|-------------|----------|------------|--------------|----------|----------|----------|-----------------|-------------|
| total mutations | 223        | 2           | 11       | 93         | 77           | 155      | 44       | 13       | 0               |             |
| Mutant ref      | Mutations  | nt Position | INDEL    | Transition | Transversion | NS       | S        | STOP     | aa substitution | aa Position |
| <b>1</b>        | <b>5</b>   |             | <b>0</b> | <b>3</b>   | <b>2</b>     | <b>4</b> | <b>1</b> | <b>0</b> | <b>5</b>        | <b>0</b>    |
|                 | AT         | 67          |          | 0          | 1            | 1        |          |          | NY              | 23,0        |
|                 | GA         | 126         |          | 1          | 0            |          | 1        |          | TT              | 42          |
|                 | TA         | 490         |          | 0          | 1            | 1        |          |          | CS              | 164,0       |
|                 | CT         | 497         |          | 1          | 0            | 1        |          |          | AV              | 166         |
|                 | GA         | 617         |          | 1          | 0            | 1        |          |          | SN              | 206         |
| <b>1'</b>       | <b>13</b>  |             | <b>1</b> | <b>3</b>   | <b>3</b>     | <b>8</b> | <b>4</b> | <b>0</b> | <b>13</b>       | <b>0</b>    |
|                 | AT         | 107         |          | 0          | 1            | 1        |          |          | EV              | 36          |
|                 | AT         | 112         |          | 0          | 1            | 1        |          |          | TS              | 28,0        |
|                 | AG         | 139         |          | 1          | 0            | 1        |          |          | KE              | 47,0        |
|                 | GA         | 148         |          | 1          | 0            | 1        |          |          | AT              | 50,0        |
|                 | CT         | 157         |          | 1          | 0            | 1        |          |          | HY              | 53,0        |



|           |          |          |          |          |          |          |          |          |          |
|-----------|----------|----------|----------|----------|----------|----------|----------|----------|----------|
|           | CG       | 221      | 0        | 1        | 1        |          |          | AG       | 74       |
|           | DELETION | 238      | 1        |          |          |          |          |          | 80,0     |
|           | TA       | 279      | 0        | 1        |          |          | 1        | GG       | 93       |
|           | GT       | 379      | 0        | 1        | 1        |          |          | AS       | 127,0    |
|           | GA       | 444      | 1        | 0        |          |          | 1        | TT       | 148      |
|           | TC       | 450      | 1        | 0        |          |          | 1        | LL       | 150      |
|           | GA       | 502      | 1        | 0        | 1        |          |          | VI       | 168,0    |
|           | GT       | 603      | 0        | 1        |          |          | 1        | LL       | 201      |
| <b>2'</b> | <b>9</b> | <b>0</b> | <b>3</b> | <b>2</b> | <b>8</b> | <b>1</b> | <b>0</b> | <b>9</b> | <b>0</b> |
|           | CA       | 44       | 0        | 1        | 1        |          |          | AD       | 15       |
|           | AG       | 124      | 1        | 0        | 1        |          |          | TA       | 42,0     |
|           | AT       | 286      | 0        | 1        | 1        |          |          | NY       | 96,0     |
|           | GA       | 404      | 1        | 0        | 1        |          |          | SN       | 135      |
|           | CT       | 410      | 1        | 0        | 1        |          |          | SL       | 137      |
|           | AT       | 480      | 0        | 1        | 1        |          |          | ED       | 160      |
|           | GT       | 499      | 0        | 1        | 1        |          |          | VL       | 167,0    |
|           | TC       | 633      | 1        | 0        |          |          | 1        | FF       | 211      |
|           | AT       | 677      | 0        | 1        | 1        |          |          | YF       | 226      |
| <b>3</b>  | <b>4</b> | <b>0</b> | <b>5</b> | <b>4</b> | <b>4</b> | <b>0</b> | <b>0</b> | <b>4</b> | <b>0</b> |
|           | AT       | 99       | 0        | 1        | 1        |          |          | ED       | 33       |
|           | AG       | 154      | 1        | 0        | 1        |          |          | KE       | 52,0     |
|           | TA       | 437      | 0        | 1        | 1        |          |          | LQ       | 146      |
|           | AT       | 486      | 0        | 1        | 1        |          |          | ED       | 162      |
| <b>3'</b> | <b>9</b> | <b>1</b> | <b>4</b> | <b>1</b> | <b>3</b> | <b>4</b> | <b>1</b> | <b>9</b> | <b>0</b> |
|           | CT       | 231      | 1        | 0        |          |          | 1        | SS       | 77       |
|           | AG       | 241      | 1        | 0        | 1        |          |          | ND       | 81,0     |
|           | AT       | 267      | 0        | 1        | 1        |          |          | ED       | 89       |
|           | GA       | 309      | 1        | 0        |          |          | 1        | KK       | 103      |
|           | GA       | 342      | 1        | 0        |          |          | 1        | KK       | 114      |
|           | AT       | 358      | 0        | 1        |          |          |          | 1 STOP   | 120,0    |

|           |          |     |          |          |          |          |          |          |          |
|-----------|----------|-----|----------|----------|----------|----------|----------|----------|----------|
| INSERTION |          | 400 | 1        |          |          |          |          |          | 134,0    |
|           | CT       | 612 |          | 1        | 0        |          | 1        | SS       | 204      |
|           | AG       | 628 |          | 1        | 0        | 1        |          | IV       | 210,0    |
| <b>4</b>  | <b>6</b> |     | <b>0</b> | <b>2</b> | <b>3</b> | <b>4</b> | <b>1</b> | <b>1</b> | <b>6</b> |
|           | AG       | 151 |          | 1        | 0        | 1        |          | TA       | 51,0     |
|           | TG       | 310 |          | 0        | 1        | 1        |          | LV       | 104,0    |
|           | TA       | 509 |          | 0        | 1        | 1        |          | VD       | 170      |
|           | AG       | 660 |          | 1        | 0        |          | 1        | RR       | 220      |
|           | TA       | 663 |          | 0        | 1        | 1        |          | NK       | 221      |
|           | CG       | 678 |          | 0        | 1        |          |          | 1 STOP   | 226      |
| <b>4'</b> | <b>0</b> |     |          |          |          |          |          |          |          |
|           |          |     |          |          |          |          |          |          | 0        |
| <b>5</b>  | <b>6</b> |     | <b>0</b> | <b>4</b> | <b>1</b> | <b>5</b> | <b>1</b> | <b>0</b> | <b>6</b> |
|           | CT       | 125 |          | 1        | 0        | 1        |          | TM       | 42       |
|           | CG       | 258 |          | 0        | 1        |          | 1        | SS       | 86       |
|           | AG       | 382 |          | 1        | 0        | 1        |          | ND       | 128,0    |
|           | GA       | 386 |          | 1        | 0        | 1        |          | GE       | 129      |
|           | GA       | 402 |          | 1        | 0        | 1        |          | MI       | 134      |
|           | TA       | 426 |          | 0        | 1        | 1        |          | DE       | 142      |
| <b>5'</b> | <b>6</b> |     | <b>0</b> | <b>3</b> | <b>2</b> | <b>5</b> | <b>1</b> | <b>0</b> | <b>6</b> |
|           | GA       | 106 |          | 1        | 0        | 1        |          | EK       | 36,0     |
|           | CA       | 113 |          | 0        | 1        | 1        |          | TN       | 38       |
|           | GC       | 190 |          | 0        | 1        | 1        |          | DH       | 64,0     |
|           | GA       | 404 |          | 1        | 0        | 1        |          | SN       | 135      |
|           | GA       | 444 |          | 1        | 0        |          | 1        | TT       | 148      |
|           | AT       | 480 |          | 0        | 1        | 1        |          | ED       | 160      |
| <b>6</b>  | <b>5</b> |     | <b>0</b> | <b>1</b> | <b>4</b> | <b>4</b> | <b>1</b> | <b>0</b> | <b>5</b> |
|           | GT       | 48  |          | 0        | 1        | 1        |          | ED       | 16       |
|           | AT       | 61  |          | 0        | 1        | 1        |          | NY       | 21,0     |
|           | GT       | 402 |          | 0        | 1        | 1        |          | MI       | 134      |

|           |          |     |          |          |          |          |          |          |          |          |
|-----------|----------|-----|----------|----------|----------|----------|----------|----------|----------|----------|
|           | AT       | 485 | 0        | 1        | 1        |          |          | EV       | 162      |          |
|           | TC       | 672 | 1        | 0        |          |          | 1        | NN       | 224      |          |
| <b>6'</b> | <b>5</b> |     | <b>0</b> | <b>0</b> | <b>5</b> | <b>4</b> | <b>1</b> | <b>0</b> | <b>5</b> | <b>0</b> |
|           | AT       | 178 | 0        | 1        | 1        |          |          | TS       | 60,0     |          |
|           | TA       | 184 | 0        | 1        | 1        |          |          | WR       | 62,0     |          |
|           | GC       | 316 | 0        | 1        | 1        |          |          | VL       | 106,0    |          |
|           | AT       | 348 | 0        | 1        | 1        |          |          | KN       | 116      |          |
|           | AT       | 357 | 0        | 1        |          |          | 1        | PP       | 119      |          |
| <b>7</b>  | <b>0</b> |     |          |          |          |          |          |          |          |          |
|           |          |     |          |          |          |          |          |          | 0        |          |
| <b>7'</b> | <b>8</b> |     | <b>1</b> | <b>3</b> | <b>1</b> | <b>6</b> | <b>0</b> | <b>1</b> | <b>8</b> | <b>0</b> |
|           | GT       | 106 | 0        | 1        |          |          |          | 1 STOP   | 36,0     |          |
|           | CT       | 128 | 1        | 0        |          | 1        |          | SL       | 43       |          |
|           | DELETION | 155 | 1        |          |          |          |          |          | 52       |          |
|           | GA       | 220 | 1        | 0        | 1        |          |          | AT       | 74,0     |          |
|           | GA       | 278 | 1        | 0        | 1        |          |          | GD       | 93       |          |
|           | AG       | 365 | 1        | 0        | 1        |          |          | EG       | 122      |          |
|           | AT       | 560 | 0        | 1        | 1        |          |          | EV       | 187      |          |
|           | CT       | 566 | 1        | 0        | 1        |          |          | AV       | 189      |          |
| <b>8</b>  | <b>5</b> |     | <b>0</b> | <b>3</b> | <b>2</b> | <b>4</b> | <b>1</b> | <b>0</b> | <b>5</b> | <b>0</b> |
|           | TA       | 81  | 0        | 1        | 1        |          |          | DE       | 27       |          |
|           | CA       | 214 | 0        | 1        | 1        |          |          | QK       | 72,0     |          |
|           | CT       | 240 | 1        | 0        |          |          | 1        | RR       | 80       |          |
|           | GA       | 424 | 1        | 0        | 1        |          |          | DN       | 142,0    |          |
|           | TC       | 572 | 1        | 0        | 1        |          |          | VA       | 191      |          |
| <b>8'</b> | <b>6</b> |     | <b>0</b> | <b>2</b> | <b>3</b> | <b>3</b> | <b>3</b> | <b>0</b> | <b>6</b> | <b>0</b> |
|           | TA       | 189 | 0        | 1        | 1        |          |          | FL       | 63       |          |
|           | CT       | 300 | 1        | 0        |          |          | 1        | HH       | 100      |          |
|           | GC       | 316 | 0        | 1        | 1        |          |          | VL       | 106,0    |          |
|           | TC       | 492 | 1        | 0        |          |          | 1        | CC       | 164      |          |

|           |          |     |          |          |          |          |          |          |          |
|-----------|----------|-----|----------|----------|----------|----------|----------|----------|----------|
|           | AT       | 501 | 0        | 1        |          | 1        |          | VV       | 167      |
|           | TG       | 535 | 0        | 1        |          | 1        |          | LV       | 179,0    |
| <b>10</b> | <b>5</b> |     | <b>0</b> | <b>1</b> | <b>4</b> | <b>3</b> | <b>1</b> | <b>1</b> | <b>5</b> |
|           | GA       | 224 | 1        | 0        |          |          |          | 1 STOP   | 75       |
|           | AT       | 382 | 0        | 1        |          | 1        |          | NY       | 128,0    |
|           | TA       | 465 | 0        | 1        |          | 1        |          | HQ       | 155      |
|           | AT       | 505 | 0        | 1        |          | 1        |          | SC       | 169,0    |
|           | AT       | 645 | 0        | 1        |          |          | 1        | AA       | 215      |
| <b>11</b> | <b>6</b> |     | <b>0</b> | <b>0</b> | <b>5</b> | <b>6</b> | <b>0</b> | <b>0</b> | <b>6</b> |
|           | AT       | 143 | 0        | 1        |          | 1        |          | EV       | 48       |
|           | GT       | 424 | 0        | 1        |          | 1        |          | DY       | 142,0    |
|           | CG       | 445 | 0        | 1        |          | 1        |          | LV       | 149,0    |
|           | GC       | 508 | 0        | 1        |          | 1        |          | VL       | 170,0    |
|           | GC       | 637 | 0        | 1        |          | 1        |          | DH       | 213,0    |
|           | GA       | 650 | 1        | 0        |          | 1        |          | RK       | 217      |
| <b>12</b> | <b>6</b> |     | <b>0</b> | <b>3</b> | <b>2</b> | <b>3</b> | <b>2</b> | <b>1</b> | <b>6</b> |
|           | GT       | 37  | 0        | 1        |          | 1        |          | DY       | 13,0     |
|           | TC       | 270 | 1        | 0        |          |          | 1        | DD       | 90       |
|           | CA       | 410 | 0        | 1        |          |          |          | 1 STOP   | 137      |
|           | AG       | 522 | 1        | 0        |          |          | 1        | GG       | 174      |
|           | TC       | 599 | 1        | 0        |          | 1        |          | FS       | 200      |
|           | AG       | 671 | 1        | 0        |          | 1        |          | NS       | 224      |
| <b>13</b> | <b>5</b> |     | <b>0</b> | <b>3</b> | <b>2</b> | <b>3</b> | <b>1</b> | <b>1</b> | <b>5</b> |
|           | GA       | 129 | 1        | 0        |          |          | 1        | SS       | 43       |
|           | GA       | 224 | 1        | 0        |          |          |          | 1 STOP   | 75       |
|           | GA       | 506 | 1        | 0        |          | 1        |          | SN       | 169      |
|           | CG       | 563 | 0        | 1        |          | 1        |          | TR       | 188      |
|           | TA       | 599 | 0        | 1        |          | 1        |          | FY       | 200      |
| <b>14</b> | <b>6</b> |     | <b>0</b> | <b>2</b> | <b>3</b> | <b>5</b> | <b>1</b> | <b>0</b> | <b>6</b> |
|           | AC       | 61  | 0        | 1        |          | 1        |          | NH       | 21,0     |

|           |           |     |          |          |          |          |          |          |           |          |
|-----------|-----------|-----|----------|----------|----------|----------|----------|----------|-----------|----------|
|           | CT        | 152 | 1        | 0        | 1        |          |          | TI       | 51        |          |
|           | TC        | 172 | 1        | 0        | 1        |          |          | SP       | 58,0      |          |
|           | AT        | 267 | 0        | 1        | 1        |          |          | ED       | 89        |          |
|           | GT        | 590 | 0        | 1        | 1        |          |          | WL       | 197       |          |
|           | CT        | 636 | 1        | 0        |          |          | 1        | HH       | 212       |          |
| <b>15</b> | <b>13</b> |     | <b>1</b> | <b>1</b> | <b>4</b> | <b>7</b> | <b>3</b> | <b>2</b> | <b>13</b> | <b>0</b> |
|           | AT        | 150 | 0        | 1        |          |          | 1        | AA       | 50        |          |
|           | TC        | 237 | 1        | 0        |          |          | 1        | LL       | 79        |          |
|           | AT        | 332 | 0        | 1        |          | 1        |          | HL       | 111       |          |
|           | TA        | 441 | 0        | 1        |          |          |          | 1 STOP   | 147       |          |
|           | CG        | 497 | 0        | 1        |          | 1        |          | AG       | 166       |          |
|           | GT        | 514 | 0        | 1        |          | 1        |          | GC       | 172,0     |          |
|           | DELETION  | 524 | 1        |          |          |          |          |          | 175       |          |
|           | GT        | 564 | 0        | 1        |          |          | 1        | TT       | 188       |          |
|           | AT        | 577 | 0        | 1        |          | 1        |          | IF       | 193,0     |          |
|           | AG        | 593 | 1        | 0        |          | 1        |          | KR       | 198       |          |
|           | AC        | 641 | 0        | 1        |          | 1        |          | DA       | 214       |          |
|           | AT        | 646 | 0        | 1        |          |          |          | 1 STOP   | 216,0     |          |
|           | GC        | 682 | 0        | 1        |          | 1        |          | VL       | 228,0     |          |
| <b>16</b> | <b>11</b> |     | <b>0</b> | <b>3</b> | <b>2</b> | <b>6</b> | <b>3</b> | <b>2</b> | <b>11</b> | <b>0</b> |
|           | AG        | 112 | 1        | 0        |          | 1        |          | TA       | 37        |          |
|           | GA        | 156 | 1        | 0        |          |          | 1        | KK       | 52        |          |
|           | CA        | 233 | 0        | 1        |          |          |          | 1 STOP   | 78        |          |
|           | TC        | 252 | 1        | 0        |          |          | 1        | TT       | 84        |          |
|           | CA        | 356 | 0        | 1        |          | 1        |          | PQ       | 119       |          |
|           | GA        | 389 | 1        | 0        |          | 1        |          | GE       | 130       |          |
|           | AG        | 430 | 1        | 0        |          | 1        |          | SG       | 144,0     |          |
|           | CA        | 463 | 0        | 1        |          | 1        |          | HN       | 155,0     |          |
|           | AT        | 592 | 0        | 1        |          |          |          | 1 STOP   | 198,0     |          |
|           | CT        | 615 | 1        | 0        |          |          | 1        | DD       | 205       |          |

|           |          |     |          |          |          |          |          |          |          |          |
|-----------|----------|-----|----------|----------|----------|----------|----------|----------|----------|----------|
|           | AT       | 656 | 0        | 1        | 1        |          |          | DV       | 219      |          |
| <b>19</b> | <b>3</b> |     | <b>0</b> | <b>6</b> | <b>3</b> | <b>3</b> | <b>0</b> | <b>0</b> | <b>3</b> | <b>0</b> |
|           | GT       | 313 | 0        | 1        | 1        |          |          | VF       | 105,0    |          |
|           | GT       | 591 | 0        | 1        | 1        |          |          | WC       | 197      |          |
|           | AG       | 635 | 1        | 0        | 1        |          |          | HR       | 212      |          |
| <b>20</b> | <b>8</b> |     | <b>1</b> | <b>4</b> | <b>1</b> | <b>5</b> | <b>1</b> | <b>1</b> | <b>8</b> | <b>0</b> |
|           | AG       | 119 | 1        | 0        | 1        |          |          | DG       | 40       |          |
|           | AG       | 139 | 1        | 0        | 1        |          |          | KE       | 47,0     |          |
|           | TC       | 329 | 1        | 0        | 1        |          |          | LS       | 110      |          |
|           | TA       | 350 | 0        | 1        | 1        |          |          | IN       | 117      |          |
|           | GA       | 354 | 1        | 0        |          |          | 1        | EE       | 118      |          |
|           | GA       | 395 | 1        | 0        |          |          |          | 1 STOP   | 132      |          |
|           | CA       | 554 | 0        | 1        | 1        |          |          | AE       | 185      |          |
|           | DELETION | 647 | 1        |          |          |          |          |          | 216      |          |
| <b>21</b> | <b>5</b> |     | <b>0</b> | <b>3</b> | <b>2</b> | <b>4</b> | <b>1</b> | <b>0</b> | <b>5</b> | <b>0</b> |
|           | TG       | 120 | 0        | 1        | 1        |          |          | DE       | 40       |          |
|           | TA       | 270 | 0        | 1        | 1        |          |          | DE       | 90       |          |
|           | GA       | 386 | 1        | 0        | 1        |          |          | GE       | 129      |          |
|           | TC       | 421 | 1        | 0        | 1        |          |          | SP       | 141,0    |          |
|           | CT       | 657 | 1        | 0        |          |          | 1        | DD       | 219      |          |
| <b>22</b> | <b>6</b> |     | <b>0</b> | <b>4</b> | <b>1</b> | <b>6</b> | <b>0</b> | <b>0</b> | <b>6</b> | <b>0</b> |
|           | AT       | 41  | 0        | 1        | 1        |          |          | EV       | 14       |          |
|           | GA       | 64  | 1        | 0        | 1        |          |          | AT       | 22,0     |          |
|           | CT       | 152 | 1        | 0        | 1        |          |          | TI       | 51       |          |
|           | TC       | 253 | 1        | 0        | 1        |          |          | FL       | 85,0     |          |
|           | TC       | 274 | 1        | 0        | 1        |          |          | WR       | 92,0     |          |
|           | GT       | 648 | 0        | 1        | 1        |          |          | KN       | 216      |          |
| <b>23</b> | <b>5</b> |     | <b>1</b> | <b>1</b> | <b>3</b> | <b>3</b> | <b>0</b> | <b>1</b> | <b>5</b> | <b>0</b> |
|           | CT       | 74  | 1        | 0        | 1        |          |          | AV       | 25       |          |
|           | TA       | 333 | 0        | 1        | 1        |          |          | HQ       | 111      |          |

|           |           |     |          |          |          |          |          |          |           |          |
|-----------|-----------|-----|----------|----------|----------|----------|----------|----------|-----------|----------|
|           | CA        | 410 |          | 0        | 1        |          |          |          | 1 STOP    | 137      |
|           | CA        | 576 |          | 0        | 1        |          | 1        |          | SR        | 192      |
|           | DELETION  | 633 | 1        |          |          |          |          |          |           | 211      |
| <b>24</b> | <b>11</b> |     | <b>1</b> | <b>5</b> | <b>0</b> | <b>8</b> | <b>1</b> | <b>1</b> | <b>11</b> | <b>0</b> |
|           | AG        | 154 |          | 1        | 0        |          | 1        |          | KE        | 52,0     |
|           | CT        | 196 |          | 1        | 0        |          | 1        |          | PS        | 66,0     |
|           | TC        | 219 |          | 1        | 0        |          |          | 1        | AA        | 73       |
|           | GA        | 220 |          | 1        | 0        |          | 1        |          | AT        | 74,0     |
|           | GA        | 363 |          | 1        | 0        |          |          |          | 1 STOP    | 121      |
|           | AT        | 365 |          | 0        | 1        |          | 1        |          | EV        | 122      |
|           | DELETION  | 413 | 1        |          |          |          |          |          |           | 138      |
|           | AT        | 529 |          | 0        | 1        |          | 1        |          | IL        | 177,0    |
|           | AT        | 548 |          | 0        | 1        |          | 1        |          | NI        | 183      |
|           | AT        | 577 |          | 0        | 1        |          | 1        |          | IF        | 193,0    |
|           | CT        | 673 |          | 1        | 0        |          | 1        |          | RC        | 225,0    |
| <b>27</b> | <b>11</b> |     | <b>1</b> | <b>4</b> | <b>1</b> | <b>8</b> | <b>2</b> | <b>0</b> | <b>11</b> | <b>0</b> |
|           | CA        | 160 |          | 0        | 1        |          | 1        |          | PT        | 54,0     |
|           | TC        | 163 |          | 1        | 0        |          |          | 1        | LL        | 55,0     |
|           | CT        | 281 |          | 1        | 0        |          | 1        |          | AV        | 94       |
|           | CT        | 463 |          | 1        | 0        |          | 1        |          | HY        | 155,0    |
|           | GA        | 514 |          | 1        | 0        |          | 1        |          | GS        | 172,0    |
|           | CT        | 551 |          | 1        | 0        |          | 1        |          | AV        | 184      |
|           | GC        | 565 |          | 0        | 1        |          | 1        |          | AP        | 189,0    |
|           | DELETION  | 647 | 1        |          |          |          |          |          |           | 216      |
|           | TA        | 653 |          | 0        | 1        |          | 1        |          | LH        | 218      |
|           | CT        | 660 |          | 1        | 0        |          |          | 1        | DD        | 220      |
|           | AT        | 657 |          | 0        | 1        |          | 1        |          | RS        | 219      |
| <b>28</b> | <b>6</b>  |     | <b>0</b> | <b>2</b> | <b>3</b> | <b>6</b> | <b>0</b> | <b>0</b> | <b>6</b>  | <b>0</b> |
|           | AG        | 131 |          | 1        | 0        |          | 1        |          | YC        | 44       |
|           | TA        | 270 |          | 0        | 1        |          | 1        |          | DE        | 90       |

|           |           |          |          |          |          |          |          |          |           |           |
|-----------|-----------|----------|----------|----------|----------|----------|----------|----------|-----------|-----------|
|           | AT        | 383      |          | 0        | 1        |          | 1        |          | NI        | 128       |
|           | GC        | 416      |          | 0        | 1        |          | 1        |          | GA        | 139       |
|           | TC        | 470      |          | 1        | 0        |          | 1        |          | FS        | 157       |
|           | CT        | 497      |          | 1        | 0        |          | 1        |          | AV        | 166       |
| <b>29</b> | <b>3</b>  |          | <b>1</b> | <b>5</b> | <b>3</b> | <b>0</b> | <b>2</b> | <b>0</b> | <b>3</b>  | <b>0</b>  |
|           | GA        | 234      |          | 1        | 0        |          |          | 1        | SS        | 78        |
|           | GA        | 585      |          | 1        | 0        |          |          | 1        | KK        | 195       |
|           | DELETION  | 647      |          | 1        |          |          |          |          |           | 216       |
| <b>30</b> | <b>10</b> | <b>2</b> | <b>2</b> | <b>3</b> | <b>2</b> | <b>4</b> | <b>4</b> | <b>0</b> | <b>10</b> | <b>-2</b> |
|           | GT        | 51       |          | 0        | 1        |          | 1        |          | KN        | 17        |
|           | AG        | 55       |          | 1        | 0        |          | 1        |          | KE        | 19,0      |
|           | GA        | 72       |          | 1        | 0        |          |          | 1        | EE        | 24        |
|           | TA        | 86       |          | 0        | 1        |          | 1        |          | VD        | 29        |
|           | GA        | 278      |          | 1        | 0        |          | 1        |          | GD        | 93        |
|           | AG        | 324      |          | 1        | 0        |          |          | 1        | AA        | 108       |
|           | TA        | 489      |          | 0        | 1        |          |          | 1        | II        | 163       |
|           | DELETION  | 529      |          | 1        |          |          |          |          |           | 177,0     |
|           | TC        | 549      |          | 1        | 0        |          |          | 1        | NN        | 183       |
|           | DELETION  | 647      |          | 1        |          |          |          |          |           | 216       |
| <b>31</b> | <b>8</b>  |          | <b>0</b> | <b>3</b> | <b>2</b> | <b>6</b> | <b>2</b> | <b>0</b> | <b>8</b>  | <b>0</b>  |
|           | AG        | 119      |          | 1        | 0        |          | 1        |          | DG        | 40        |
|           | CT        | 157      |          | 1        | 0        |          | 1        |          | HY        | 53,0      |
|           | CA        | 295      |          | 0        | 1        |          | 1        |          | HN        | 99,0      |
|           | AT        | 398      |          | 0        | 1        |          | 1        |          | KI        | 133       |
|           | TC        | 489      |          | 1        | 0        |          |          | 1        | II        | 163       |
|           | CT        | 627      |          | 1        | 0        |          |          | 1        | FF        | 209       |
|           | AT        | 647      |          | 0        | 1        |          | 1        |          | KM        | 216       |
|           | CA        | 652      |          | 0        | 1        |          | 1        |          | LI        | 218,0     |
| <b>32</b> | <b>8</b>  |          | <b>0</b> | <b>4</b> | <b>1</b> | <b>7</b> | <b>1</b> | <b>0</b> | <b>8</b>  | <b>0</b>  |
|           | GA        | 88       |          | 1        | 0        |          | 1        |          | EK        | 30,0      |



|    |     |   |   |   |   |    |       |
|----|-----|---|---|---|---|----|-------|
| GA | 230 | 1 | 0 | 1 |   | SN | 77    |
| GA | 244 | 1 | 0 | 1 |   | VI | 82,0  |
| CG | 443 | 0 | 1 | 1 |   | TR | 148   |
| TC | 534 | 1 | 0 |   | 1 | SS | 178   |
| CG | 566 | 0 | 1 | 1 |   | AG | 189   |
| GA | 622 | 1 | 0 | 1 |   | GS | 208,0 |
| TA | 642 | 0 | 1 | 1 |   | DE | 214   |

|           |    |
|-----------|----|
| TA        | 20 |
| AT        | 38 |
| CG        | 8  |
| GC        | 8  |
| TG        | 3  |
| GT        | 15 |
| GA        | 38 |
| AG        | 22 |
| CA        | 13 |
| AC        | 2  |
| TC        | 20 |
| CT        | 25 |
| INSERTION | 1  |
| DELETION  | 10 |

| Library sample  | VPg HIGH |   |    |     |     |     |    |   |   |
|-----------------|----------|---|----|-----|-----|-----|----|---|---|
| total mutations | 229      | 0 | 12 | 120 | 107 | 156 | 52 | 9 | 0 |

| Mutant ref | Mutations | nt Position | INDEL    | Transition | Transversion | NS       | S        | STOP     | aa substitution | aa Position |
|------------|-----------|-------------|----------|------------|--------------|----------|----------|----------|-----------------|-------------|
| <b>1</b>   | <b>8</b>  |             | <b>0</b> | <b>6</b>   | <b>2</b>     | <b>5</b> | <b>3</b> | <b>0</b> | <b>8</b>        | <b>0</b>    |
|            | GA        | 65          |          | 1          | 0            | 1        |          |          | GD              | 22          |
|            | AG        | 140         |          | 1          | 0            | 1        |          |          | KR              | 47          |
|            | TA        | 152         |          | 0          | 1            | 1        |          |          | VD              | 51          |
|            | TC        | 156         |          | 1          | 0            |          | 1        |          | GG              | 52          |
|            | CT        | 162         |          | 1          | 0            |          | 1        |          | GG              | 54          |
|            | GC        | 414         |          | 0          | 1            | 1        |          |          | KN              | 138         |
|            | TC        | 475         |          | 1          | 0            | 1        |          |          | FL              | 159,0       |
|            | GA        | 489         |          | 1          | 0            |          | 1        |          | EE              | 163         |
| <b>2</b>   | <b>7</b>  |             | <b>2</b> | <b>1</b>   | <b>6</b>     | <b>3</b> | <b>1</b> | <b>1</b> | <b>7</b>        | <b>0</b>    |
|            | DELETION  | 155         | 1        | 0          | 1            |          |          |          |                 | 52          |
|            | AT        | 195         |          | 0          | 1            |          | 1        |          | GG              | 65          |
|            | AG        | 313         |          | 1          | 0            | 1        |          |          | RG              | 105,0       |
|            | CA        | 369         |          | 0          | 1            | 1        |          |          | SR              | 123         |
|            | AT        | 370         |          | 0          | 1            | 1        |          |          | IL              | 124,0       |
|            | DELETION  | 434         | 1        | 0          | 1            |          |          |          |                 | 145         |
|            | TA        | 450         |          | 0          | 1            |          |          | 1 STOP   |                 | 150         |
| <b>3</b>   | <b>5</b>  |             | <b>2</b> | <b>1</b>   | <b>4</b>     | <b>3</b> | <b>0</b> | <b>0</b> | <b>5</b>        | <b>0</b>    |
|            | DELETION  | 65          | 1        | 0          | 1            |          |          |          |                 | 22          |
|            | AT        | 258         |          | 0          | 1            | 1        |          |          | ED              | 86          |
|            | DELETION  | 279         | 1        | 0          | 1            |          |          |          |                 | 93          |
|            | AG        | 372         |          | 1          | 0            | 1        |          |          | IM              | 124         |
|            | GT        | 386         |          | 0          | 1            | 1        |          |          | RM              | 129         |
| <b>4</b>   | <b>5</b>  |             | <b>0</b> | <b>3</b>   | <b>2</b>     | <b>5</b> | <b>0</b> | <b>0</b> | <b>5</b>        | <b>0</b>    |
|            | GC        | 265         |          | 0          | 1            | 1        |          |          | VL              | 89,0        |
|            | TC        | 383         |          | 1          | 0            | 1        |          |          | FS              | 128         |
|            | AG        | 473         |          | 1          | 0            | 1        |          |          | KR              | 158         |
|            | CA        | 479         |          | 0          | 1            | 1        |          |          | PH              | 160         |
|            | AG        | 527         |          | 1          | 0            | 1        |          |          | NS              | 176         |

|          |           |          |          |          |          |          |          |           |          |
|----------|-----------|----------|----------|----------|----------|----------|----------|-----------|----------|
| <b>5</b> | <b>5</b>  | <b>0</b> | <b>3</b> | <b>2</b> | <b>4</b> | <b>1</b> | <b>0</b> | <b>5</b>  | <b>0</b> |
|          | GA        | 376      | 1        | 0        | 1        |          |          | AT        | 126,0    |
|          | TA        | 378      | 0        | 1        | 1        |          |          | AT        | 126      |
|          | GC        | 504      | 0        | 1        | 1        |          |          | QH        | 168      |
|          | GA        | 517      | 1        | 0        | 1        |          |          | VM        | 173,0    |
|          | TC        | 561      | 1        | 0        |          | 1        |          | HH        | 187      |
| <b>6</b> | <b>6</b>  | <b>0</b> | <b>4</b> | <b>2</b> | <b>5</b> | <b>1</b> | <b>0</b> | <b>6</b>  | <b>0</b> |
|          | GA        | 65       | 1        | 0        | 1        |          |          | GD        | 22       |
|          | AC        | 83       | 0        | 1        | 1        |          |          | NT        | 28       |
|          | CT        | 149      | 1        | 0        | 1        |          |          | TI        | 50       |
|          | TC        | 234      | 1        | 0        |          | 1        |          | DD        | 78       |
|          | CT        | 242      | 1        | 0        | 1        |          |          | TI        | 81       |
|          | GC        | 256      | 0        | 1        | 1        |          |          | EQ        | 86,0     |
| <b>7</b> | <b>11</b> | <b>0</b> | <b>5</b> | <b>6</b> | <b>6</b> | <b>3</b> | <b>2</b> | <b>11</b> | <b>0</b> |
|          | AT        | 124      | 0        | 1        |          |          |          | 1 STOP    | 42,0     |
|          | AT        | 139      | 0        | 1        |          |          |          | 1 STOP    | 47,0     |
|          | CT        | 180      | 1        | 0        |          | 1        |          | FF        | 60       |
|          | AT        | 204      | 0        | 1        |          | 1        |          | PP        | 68       |
|          | CT        | 267      | 1        | 0        |          | 1        |          | VV        | 89       |
|          | GC        | 315      | 0        | 1        | 1        |          |          | RS        | 105      |
|          | AT        | 326      | 0        | 1        | 1        |          |          | EV        | 109      |
|          | GC        | 340      | 0        | 1        | 1        |          |          | ER        | 114,0    |
|          | AG        | 341      | 1        | 0        | 1        |          |          | ER        | 114      |
|          | GA        | 469      | 1        | 0        | 1        |          |          | AT        | 157,0    |
|          | AG        | 548      | 1        | 0        | 1        |          |          | QR        | 183      |
| <b>8</b> | <b>8</b>  | <b>2</b> | <b>5</b> | <b>3</b> | <b>3</b> | <b>3</b> | <b>0</b> | <b>8</b>  | <b>0</b> |
|          | GA        | 57       | 1        | 0        |          | 1        |          | KK        | 19       |
|          | DELETION  | 110      | 1        | 0        | 1        |          |          |           | 37       |
|          | TA        | 118      | 0        | 1        | 1        |          |          | YN        | 40,0     |
|          | AG        | 133      | 1        | 0        | 1        |          |          | KE        | 45,0     |

|           |          |     |          |          |          |          |          |          |          |          |
|-----------|----------|-----|----------|----------|----------|----------|----------|----------|----------|----------|
|           | CT       | 180 |          | 1        | 0        |          | 1        |          | FF       | 60       |
|           | TC       | 196 |          | 1        | 0        |          | 1        |          | FL       | 66,0     |
|           | DELETION | 223 | 1        | 0        | 1        |          |          |          |          | 75,0     |
|           | CT       | 240 |          | 1        | 0        |          | 1        |          | FF       | 80       |
| <b>9</b>  | <b>6</b> |     | <b>0</b> | <b>4</b> | <b>2</b> | <b>5</b> | <b>1</b> | <b>0</b> | <b>6</b> | <b>0</b> |
|           | CT       | 42  |          | 1        | 0        |          | 1        |          | RR       | 14       |
|           | CT       | 47  |          | 1        | 0        |          | 1        |          | AV       | 16       |
|           | GA       | 52  |          | 1        | 0        |          | 1        |          | DN       | 18,0     |
|           | GT       | 281 |          | 0        | 1        |          | 1        |          | RM       | 94       |
|           | GA       | 400 |          | 1        | 0        |          | 1        |          | DN       | 134,0    |
|           | AC       | 405 |          | 0        | 1        |          | 1        |          | KN       | 135      |
| <b>10</b> | <b>4</b> |     | <b>0</b> | <b>3</b> | <b>1</b> | <b>3</b> | <b>1</b> | <b>0</b> | <b>4</b> | <b>0</b> |
|           | GA       | 154 |          | 1        | 0        |          | 1        |          | GS       | 52,0     |
|           | CT       | 377 |          | 1        | 0        |          | 1        |          | AV       | 126      |
|           | AT       | 494 |          | 0        | 1        |          | 1        |          | EV       | 165      |
|           | AG       | 552 |          | 1        | 0        |          |          | 1        | EE       | 184      |
| <b>14</b> | <b>8</b> |     | <b>0</b> | <b>2</b> | <b>6</b> | <b>7</b> | <b>1</b> | <b>0</b> | <b>8</b> | <b>0</b> |
|           | GA       | 99  |          | 1        | 0        |          |          | 1        | EE       | 33       |
|           | GC       | 155 |          | 0        | 1        |          | 1        |          | GA       | 52       |
|           | GT       | 176 |          | 0        | 1        |          | 1        |          | RI       | 59       |
|           | GT       | 368 |          | 0        | 1        |          | 1        |          | SI       | 123      |
|           | AT       | 405 |          | 0        | 1        |          | 1        |          | KN       | 135      |
|           | AC       | 466 |          | 0        | 1        |          | 1        |          | IL       | 156,0    |
|           | TC       | 491 |          | 1        | 0        |          | 1        |          | FS       | 164      |
|           | CG       | 512 |          | 0        | 1        |          | 1        |          | PR       | 171      |
| <b>15</b> | <b>7</b> |     | <b>0</b> | <b>1</b> | <b>6</b> | <b>6</b> | <b>1</b> | <b>0</b> | <b>7</b> | <b>0</b> |
|           | AT       | 80  |          | 0        | 1        |          | 1        |          | NI       | 27       |
|           | AT       | 225 |          | 0        | 1        |          | 1        |          | QH       | 75       |
|           | CT       | 248 |          | 1        | 0        |          | 1        |          | AV       | 83       |
|           | CA       | 351 |          | 0        | 1        |          |          | 1        | AA       | 117      |

|           |                 |     |          |          |          |          |          |          |           |          |
|-----------|-----------------|-----|----------|----------|----------|----------|----------|----------|-----------|----------|
|           | GC              | 386 | 0        | 1        | 1        |          |          | RT       | 129       |          |
|           | GC              | 485 | 0        | 1        | 1        |          |          | RT       | 162       |          |
|           | AT              | 499 | 0        | 1        | 1        |          |          | RW       | 167,0     |          |
| <b>16</b> | <b>14</b>       |     | <b>0</b> | <b>8</b> | <b>6</b> | <b>8</b> | <b>5</b> | <b>1</b> | <b>14</b> | <b>0</b> |
|           | AT              | 44  | 0        | 1        | 1        |          |          | HL       | 15        |          |
|           | AT              | 121 | 0        | 1        | 1        |          |          | RW       | 41,0      |          |
|           | CA              | 147 | 0        | 1        |          |          | 1        | TT       | 49        |          |
|           | CT              | 242 | 1        | 0        | 1        |          |          | TI       | 81        |          |
|           | AT              | 316 | 0        | 1        |          |          |          | 1 STOP   | 106,0     |          |
|           | GA              | 376 | 1        | 0        | 1        |          |          | AI       | 126,0     |          |
|           | CT              | 377 | 1        | 0        | 1        |          |          | AI       | 126       |          |
|           | TC              | 399 | 1        | 0        |          |          | 1        | SS       | 133       |          |
|           | TC              | 425 | 1        | 0        | 1        |          |          | MT       | 142       |          |
|           | AT              | 431 | 0        | 1        | 1        |          |          | HL       | 144       |          |
|           | CT              | 453 | 1        | 0        |          |          | 1        | DD       | 151       |          |
|           | AG              | 486 | 1        | 0        |          |          | 1        | RR       | 162       |          |
|           | TA              | 491 | 0        | 1        | 1        |          |          | FY       | 164       |          |
|           | AG              | 552 | 1        | 0        |          |          | 1        | EE       | 184       |          |
| <b>17</b> | <b>9</b>        |     | <b>1</b> | <b>5</b> | <b>3</b> | <b>7</b> | <b>1</b> | <b>0</b> | <b>9</b>  | <b>0</b> |
|           | AT              | 72  | 0        | 1        | 1        |          |          | ED       | 24        |          |
|           | AG              | 96  | 1        | 0        | 1        |          |          | IM       | 32        |          |
|           | AG              | 262 | 1        | 0        | 1        |          |          | ND       | 88,0      |          |
|           | TG              | 393 | 0        | 1        | 1        |          |          | DE       | 131       |          |
|           | TC              | 409 | 1        | 0        |          |          | 1        | LL       | 137,0     |          |
|           | AG              | 461 | 1        | 0        | 1        |          |          | NS       | 154       |          |
|           | GA              | 469 | 1        | 0        | 1        |          |          | AT       | 157,0     |          |
|           | CG              | 511 | 0        | 1        | 1        |          |          | PA       | 171,0     |          |
|           | <b>DELETION</b> | 535 | 1        | 0        |          |          |          |          | 179,0     |          |
| <b>18</b> | <b>12</b>       |     | <b>1</b> | <b>9</b> | <b>2</b> | <b>9</b> | <b>1</b> | <b>1</b> | <b>12</b> | <b>0</b> |
|           | GA              | 41  | 1        | 0        | 1        |          |          | RH       | 14        |          |

|           |           |          |          |          |          |          |          |           |          |       |
|-----------|-----------|----------|----------|----------|----------|----------|----------|-----------|----------|-------|
| CT        | 42        |          | 1        | 0        |          | 1        |          |           | RH       | 14    |
| AT        | 86        |          | 0        | 1        |          | 1        |          |           | DV       | 29    |
| AG        | 157       |          | 1        | 0        |          | 1        |          |           | MV       | 53,0  |
| GC        | 170       |          | 0        | 1        |          | 1        |          |           | ST       | 57    |
| TC        | 211       |          | 1        | 0        |          | 1        |          |           | YH       | 71,0  |
| DELETION  | 222       | 1        | 0        |          |          |          |          |           |          | 74    |
| TC        | 360       |          | 1        | 0        |          |          | 1        |           | SS       | 120   |
| GA        | 400       |          | 1        | 0        |          | 1        |          |           | DN       | 134,0 |
| CT        | 402       |          | 1        | 0        |          | 1        |          |           | DN       | 134   |
| AG        | 434       |          | 1        | 0        |          | 1        |          |           | NS       | 145   |
| CT        | 502       |          | 1        | 0        |          |          |          | 1         | STOP     | 168,0 |
| <b>19</b> | <b>11</b> | <b>0</b> | <b>8</b> | <b>3</b> | <b>8</b> | <b>3</b> | <b>0</b> | <b>11</b> | <b>0</b> |       |
| TC        | 107       |          | 1        | 0        |          | 1        |          |           | FS       | 36    |
| GA        | 154       |          | 1        | 0        |          | 1        |          |           | GS       | 52,0  |
| GA        | 259       |          | 1        | 0        |          | 1        |          |           | EK       | 87,0  |
| GA        | 309       |          | 1        | 0        |          |          | 1        |           | VV       | 103   |
| TA        | 320       |          | 0        | 1        |          | 1        |          |           | MK       | 107   |
| AG        | 342       |          | 1        | 0        |          |          | 1        |           | EE       | 114   |
| AT        | 361       |          | 0        | 1        |          | 1        |          |           | NY       | 121,0 |
| CT        | 365       |          | 1        | 0        |          | 1        |          |           | TM       | 122   |
| CT        | 402       |          | 1        | 0        |          |          | 1        |           | DD       | 134   |
| AT        | 455       |          | 0        | 1        |          | 1        |          |           | KI       | 152   |
| GA        | 508       |          | 1        | 0        |          | 1        |          |           | GR       | 170,0 |
| <b>20</b> | <b>7</b>  | <b>0</b> | <b>4</b> | <b>3</b> | <b>7</b> | <b>0</b> | <b>0</b> | <b>7</b>  | <b>0</b> |       |
| TA        | 103       |          | 0        | 1        |          | 1        |          |           | FI       | 35,0  |
| GC        | 155       |          | 0        | 1        |          | 1        |          |           | GA       | 52    |
| GA        | 245       |          | 1        | 0        |          | 1        |          |           | GE       | 82    |
| GA        | 331       |          | 1        | 0        |          | 1        |          |           | DN       | 111,0 |
| TC        | 410       |          | 1        | 0        |          | 1        |          |           | LS       | 137   |
| CA        | 428       |          | 0        | 1        |          | 1        |          |           | PQ       | 143   |

|           |           |     |          |          |          |           |          |          |           |          |
|-----------|-----------|-----|----------|----------|----------|-----------|----------|----------|-----------|----------|
|           | AG        | 473 |          | 1        | 0        |           | 1        |          | KR        | 158      |
| <b>21</b> | <b>5</b>  |     | <b>0</b> | <b>5</b> | <b>0</b> | <b>2</b>  | <b>2</b> | <b>1</b> | <b>5</b>  | <b>0</b> |
|           | GA        | 265 |          | 1        | 0        |           | 1        |          | VI        | 89,0     |
|           | CT        | 344 |          | 1        | 0        |           | 1        |          | PL        | 115      |
|           | GA        | 396 |          | 1        | 0        |           |          | 1        | 1 STOP    | 132      |
|           | GA        | 498 |          | 1        | 0        |           |          | 1        | LL        | 166      |
|           | TC        | 516 |          | 1        | 0        |           |          | 1        | AA        | 172      |
| <b>22</b> | <b>11</b> |     | <b>0</b> | <b>5</b> | <b>6</b> | <b>10</b> | <b>1</b> | <b>0</b> | <b>11</b> | <b>0</b> |
|           | GT        | 61  |          | 0        | 1        |           | 1        |          | AS        | 21,0     |
|           | CT        | 120 |          | 1        | 0        |           |          | 1        | YY        | 40       |
|           | GC        | 155 |          | 0        | 1        |           | 1        |          | GA        | 52       |
|           | AG        | 233 |          | 1        | 0        |           | 1        |          | DG        | 78       |
|           | AG        | 284 |          | 1        | 0        |           | 1        |          | DG        | 95       |
|           | TA        | 300 |          | 0        | 1        |           | 1        |          | FL        | 100      |
|           | AG        | 305 |          | 0        | 1        |           | 1        |          | EG        | 102      |
|           | CT        | 377 |          | 1        | 0        |           | 1        |          | AV        | 126      |
|           | CG        | 430 |          | 1        | 0        |           | 1        |          | HD        | 144,0    |
|           | AT        | 466 |          | 0        | 1        |           | 1        |          | IF        | 156,0    |
|           | TA        | 497 |          | 0        | 1        |           | 1        |          | LQ        | 166      |
| <b>23</b> | <b>8</b>  |     | <b>0</b> | <b>6</b> | <b>2</b> | <b>6</b>  | <b>2</b> | <b>0</b> | <b>8</b>  | <b>0</b> |
|           | TC        | 84  |          | 1        | 0        |           |          | 1        | NN        | 28       |
|           | AG        | 133 |          | 1        | 0        |           | 1        |          | KE        | 45,0     |
|           | CT        | 146 |          | 1        | 0        |           | 1        |          | TI        | 49       |
|           | AG        | 204 |          | 1        | 0        |           |          | 1        | PP        | 68       |
|           | AT        | 205 |          | 0        | 1        |           | 1        |          | TS        | 69,0     |
|           | GT        | 349 |          | 0        | 1        |           | 1        |          | AS        | 117,0    |
|           | AG        | 460 |          | 1        | 0        |           | 1        |          | ND        | 154,0    |
|           | GA        | 464 |          | 1        | 0        |           | 1        |          | GD        | 155      |
| <b>24</b> | <b>13</b> |     | <b>0</b> | <b>7</b> | <b>6</b> | <b>8</b>  | <b>4</b> | <b>1</b> | <b>13</b> | <b>0</b> |
|           | GC        | 123 |          | 0        | 1        |           | 1        |          | RS        | 41       |

|           |           |          |          |          |          |          |          |           |          |
|-----------|-----------|----------|----------|----------|----------|----------|----------|-----------|----------|
| AT        | 191       | 0        | 1        | 1        |          |          |          | YF        | 64       |
| CA        | 228       | 0        | 1        | 1        |          |          |          | FL        | 76       |
| TC        | 270       | 1        | 0        |          |          |          | 1        | YY        | 90       |
| TC        | 300       | 1        | 0        |          |          |          | 1        | FF        | 100      |
| CT        | 344       | 1        | 0        |          |          | 1        |          | PL        | 115      |
| GA        | 349       | 1        | 0        |          |          | 1        |          | AT        | 117,0    |
| GA        | 366       | 1        | 0        |          |          |          | 1        | TT        | 122      |
| CG        | 377       | 0        | 1        |          |          | 1        |          | AG        | 126      |
| GA        | 418       | 1        | 0        |          |          | 1        |          | DN        | 140,0    |
| AT        | 532       | 0        | 1        |          |          |          |          | 1 STOP    | 178,0    |
| AG        | 536       | 1        | 0        |          |          | 1        |          | DG        | 179      |
| AT        | 540       | 0        | 1        |          |          |          | 1        | II        | 180      |
| <b>25</b> | <b>8</b>  | <b>0</b> | <b>5</b> | <b>3</b> | <b>4</b> | <b>4</b> | <b>0</b> | <b>8</b>  | <b>0</b> |
| AT        | 96        | 0        | 1        |          |          |          | 1        | II        | 32       |
| AG        | 216       | 1        | 0        |          |          |          | 1        | SS        | 72       |
| CT        | 219       | 1        | 0        |          |          |          | 1        | FF        | 73       |
| AG        | 269       | 1        | 0        |          |          | 1        |          | YC        | 90       |
| CT        | 377       | 1        | 0        |          |          | 1        |          | AV        | 126      |
| GC        | 444       | 0        | 1        |          |          | 1        |          | KN        | 148      |
| AG        | 459       | 1        | 0        |          |          |          | 1        | TT        | 153      |
| AT        | 538       | 0        | 1        |          |          | 1        |          | IL        | 180,0    |
| <b>26</b> | <b>11</b> | <b>0</b> | <b>7</b> | <b>4</b> | <b>5</b> | <b>5</b> | <b>1</b> | <b>11</b> | <b>0</b> |
| AT        | 34        | 0        | 1        |          |          |          |          | 1 STOP    | 12,0     |
| CT        | 78        | 1        | 0        |          |          |          | 1        | DD        | 26       |
| TC        | 114       | 1        | 0        |          |          |          | 1        | SS        | 38       |
| TA        | 198       | 0        | 1        |          |          | 1        |          | FL        | 66       |
| GA        | 247       | 1        | 0        |          |          | 1        |          | AT        | 83,0     |
| AG        | 312       | 1        | 0        |          |          |          | 1        | RR        | 104      |
| TC        | 323       | 1        | 0        |          |          | 1        |          | VA        | 108      |
| GT        | 331       | 0        | 1        |          |          | 1        |          | DY        | 111,0    |



|           |           |     |          |          |          |          |          |          |   |           |          |
|-----------|-----------|-----|----------|----------|----------|----------|----------|----------|---|-----------|----------|
|           | GA        | 411 |          | 1        | 0        |          |          | 1        |   | LL        | 137      |
|           | GA        | 517 |          | 1        | 0        |          | 1        |          |   | VM        | 173,0    |
|           | AT        | 540 |          | 0        | 1        |          |          | 1        |   | II        | 180      |
| <b>27</b> | <b>5</b>  |     | <b>2</b> | <b>2</b> | <b>3</b> | <b>3</b> | <b>0</b> | <b>0</b> |   | <b>5</b>  | <b>0</b> |
|           | INSERTION | 103 |          | 1        | 0        |          |          |          |   |           | 35,0     |
|           | DELETION  | 225 |          | 1        | 0        |          |          |          |   |           | 75       |
|           | GT        | 349 |          |          | 0        |          | 1        |          |   | AS        | 117,0    |
|           | CT        | 365 |          |          | 1        |          |          | 1        |   | TM        | 122      |
|           | GA        | 529 |          |          | 1        |          |          | 1        |   | VM        | 177,0    |
| <b>28</b> | <b>7</b>  |     | <b>0</b> | <b>2</b> | <b>5</b> | <b>5</b> | <b>2</b> | <b>0</b> |   | <b>7</b>  | <b>0</b> |
|           | GA        | 60  |          |          | 1        |          |          |          | 1 | RR        | 20       |
|           | GA        | 65  |          |          | 1        |          |          |          |   | GD        | 22       |
|           | GT        | 307 |          |          | 0        |          |          |          |   | VL        | 103,0    |
|           | TG        | 323 |          |          | 0        |          |          |          |   | VG        | 108      |
|           | CG        | 369 |          |          | 0        |          |          |          |   | SR        | 123      |
|           | AC        | 429 |          |          | 0        |          |          |          | 1 | PP        | 143      |
|           | GT        | 500 |          |          | 0        |          |          |          |   | RM        | 167      |
| <b>29</b> | <b>11</b> |     | <b>1</b> | <b>2</b> | <b>9</b> | <b>8</b> | <b>2</b> | <b>0</b> |   | <b>11</b> | <b>0</b> |
|           | TA        | 48  |          |          | 0        |          |          |          | 1 | AA        | 16       |
|           | GT        | 57  |          |          | 0        |          |          |          |   | KN        | 19       |
|           | GT        | 76  |          |          | 0        |          |          |          |   | DY        | 26,0     |
|           | GC        | 97  |          |          | 0        |          |          |          |   | EQ        | 33,0     |
|           | GC        | 155 |          |          | 0        |          |          |          |   | GA        | 52       |
|           | TC        | 179 |          |          | 1        |          |          |          |   | FS        | 60       |
|           | TC        | 264 |          |          | 1        |          |          |          | 1 | NN        | 88       |
|           | CA        | 272 |          |          | 0        |          |          |          |   | AD        | 91       |
|           | AT        | 317 |          |          | 0        |          |          |          |   | KM        | 106      |
|           | DELETION  | 351 |          |          | 1        |          |          |          |   |           | 117      |
|           | TA        | 539 |          |          | 0        |          |          |          |   | IK        | 180      |
| <b>30</b> | <b>7</b>  |     | <b>0</b> | <b>4</b> | <b>3</b> | <b>3</b> | <b>3</b> | <b>1</b> |   | <b>7</b>  | <b>0</b> |

|           |          |     |          |          |          |          |          |          |          |          |
|-----------|----------|-----|----------|----------|----------|----------|----------|----------|----------|----------|
|           | CG       | 62  | 0        | 1        | 1        |          |          | AG       | 21       |          |
|           | TC       | 84  | 1        | 0        |          |          | 1        | NN       | 28       |          |
|           | CT       | 240 | 1        | 0        |          |          | 1        | LL       | 80       |          |
|           | TA       | 266 | 0        | 1        | 1        |          |          | VD       | 89       |          |
|           | AT       | 341 | 0        | 1        | 1        |          |          | EV       | 114      |          |
|           | CT       | 369 | 1        | 0        |          |          | 1        | SS       | 123      |          |
|           | GA       | 396 | 1        | 0        |          |          |          | 1 STOP   | 132      |          |
| <b>31</b> | <b>4</b> |     | <b>1</b> | <b>1</b> | <b>3</b> | <b>3</b> | <b>0</b> | <b>0</b> | <b>4</b> | <b>0</b> |
|           | DELETION | 141 | 1        | 0        | 1        |          |          |          |          | 47       |
|           | GA       | 161 | 1        | 0        | 1        |          |          | GD       | 54       |          |
|           | CG       | 272 | 0        | 1        | 1        |          |          | AG       | 91       |          |
|           | GC       | 354 | 0        | 1        | 1        |          |          | LF       | 118      |          |
| <b>33</b> | <b>6</b> |     | <b>0</b> | <b>2</b> | <b>4</b> | <b>5</b> | <b>1</b> | <b>0</b> | <b>6</b> | <b>0</b> |
|           | AT       | 125 | 0        | 1        | 1        |          |          | KM       | 42       |          |
|           | CG       | 149 | 0        | 1        | 1        |          |          | TR       | 50       |          |
|           | TG       | 190 | 0        | 1        | 1        |          |          | YD       | 64,0     |          |
|           | GA       | 322 | 1        | 0        | 1        |          |          | VI       | 108,0    |          |
|           | AT       | 404 | 0        | 1        | 1        |          |          | KI       | 135      |          |
|           | TC       | 408 | 1        | 0        |          |          | 1        | AA       | 136      |          |

TA 13  
 AT 33  
 CG 8  
 GC 17  
 TG 3  
 GT 12  
 GA 37  
 AG 29  
 CA 7
